# Supplementary material for: Enalapril mitigates senescence and aging-related phenotypes in human cells and mice via pSmad1/5/9-driven antioxidative genes
Source: eLife journal article supplement (doi:10.7554/elife.104774), 2025-02-12
Supplement: fig1-data1 [file elife-104774-fig1-data1-v1.zip]

Figure 1, Source Data 1

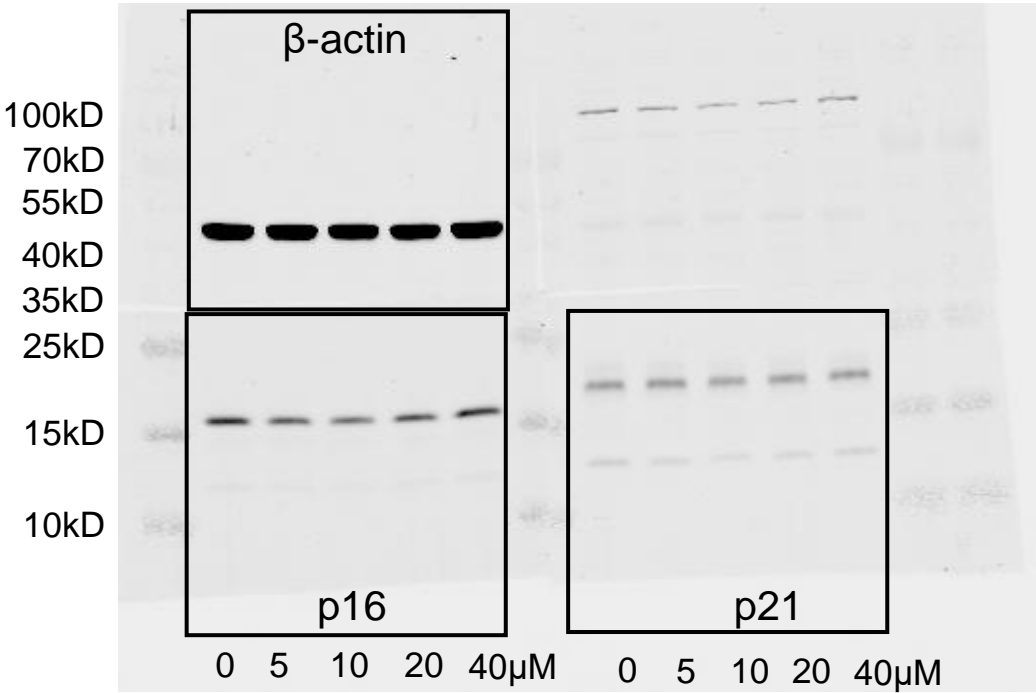

**Figure 1, Source Data 1.** Original membranes corresponding to Figure 1C. Lanes from left to right correspond to IMR90 cells treated with enalapril at 0, 5, 10, 20, and 40  $\mu$ M, respectively.
