# Supplementary material for: Enalapril mitigates senescence and aging-related phenotypes in human cells and mice via pSmad1/5/9-driven antioxidative genes
Source: eLife journal article supplement (doi:10.7554/elife.104774), 2025-02-12
Supplement: fig2-figsupp1-data1 [file elife-104774-fig2-figsupp1-data1-v1.zip]

Figure 2-figure supplement 1, Source Data 1

Figure 2-figure supplement 1A

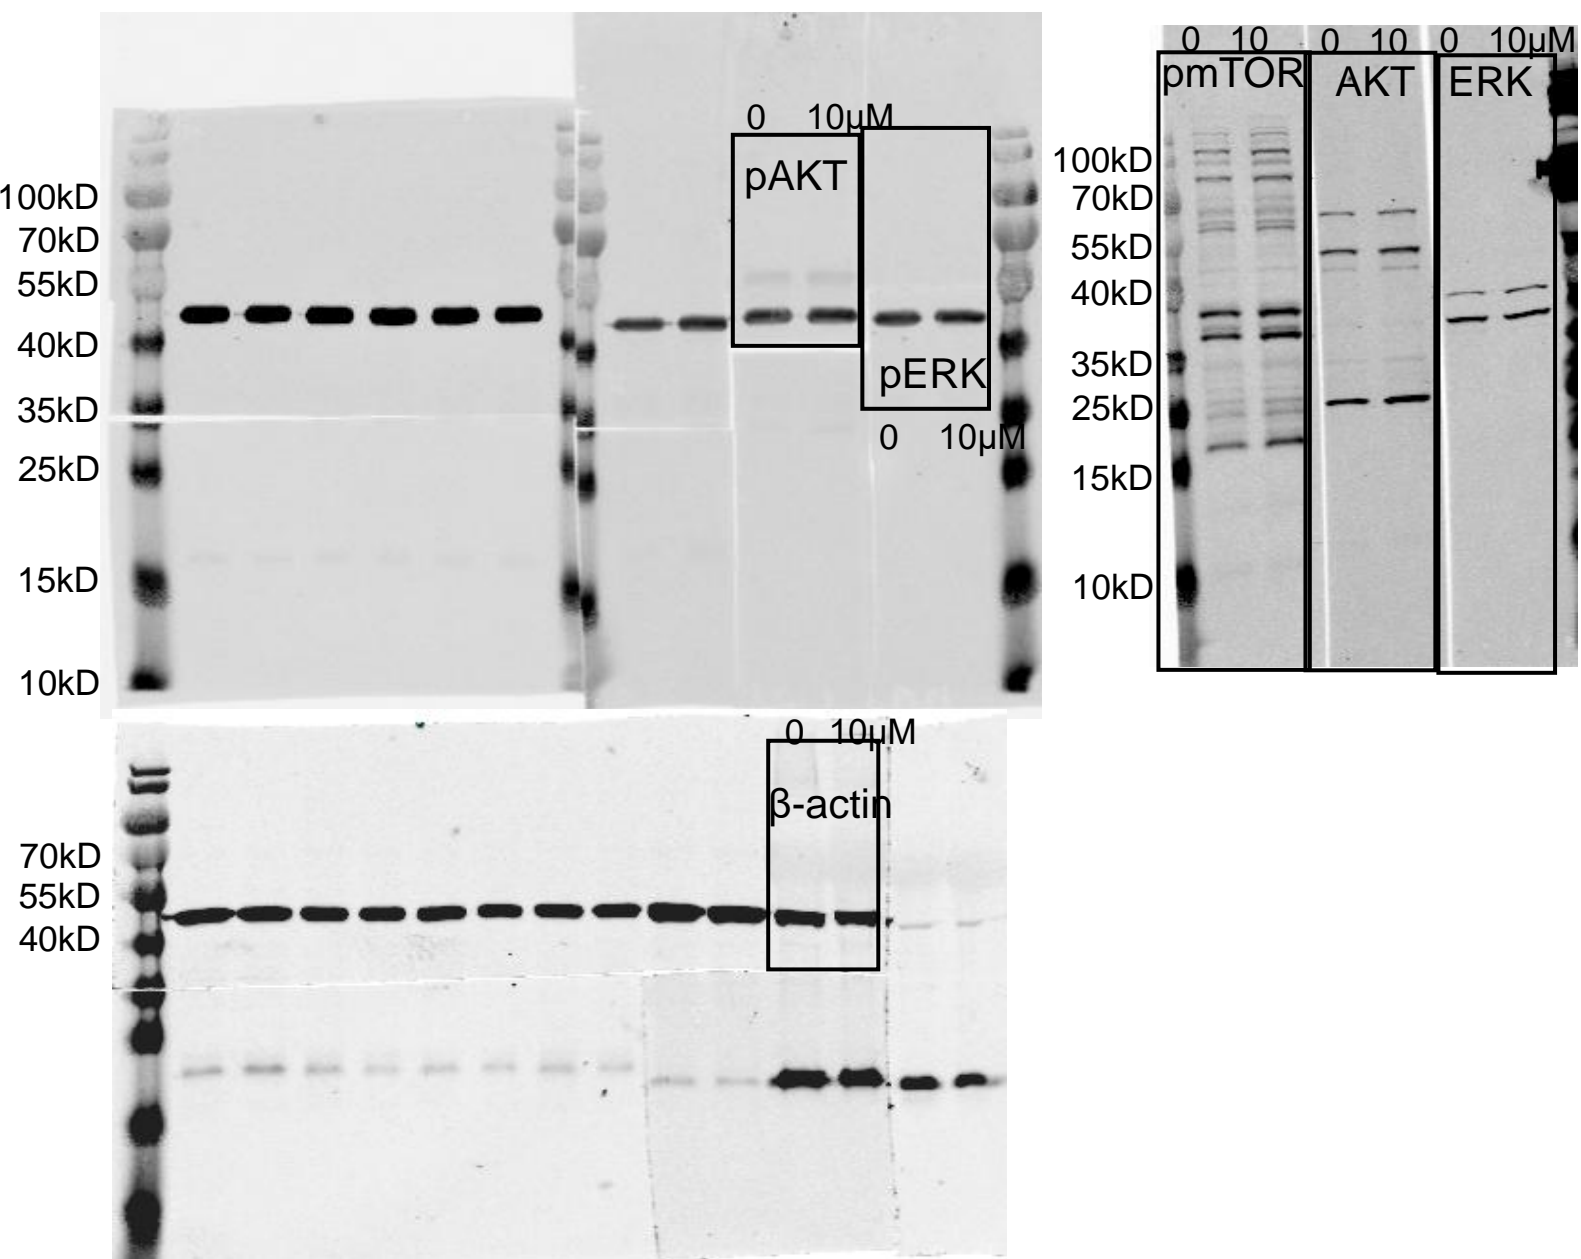

Figure 2-figure supplement 1B

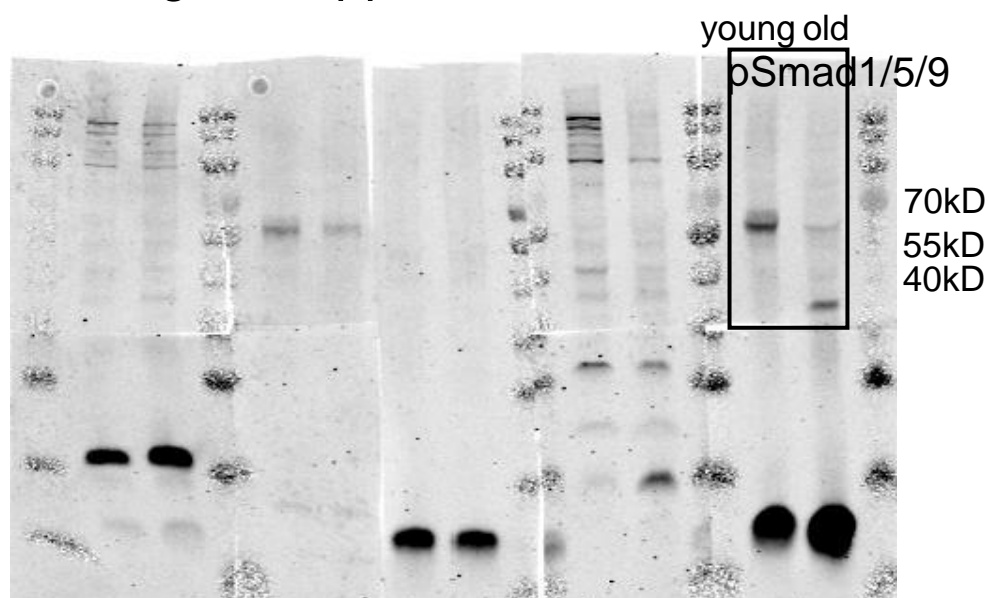

Figure 2-figure supplement 1, Source Data 1

Figure 2-figure supplement 1B

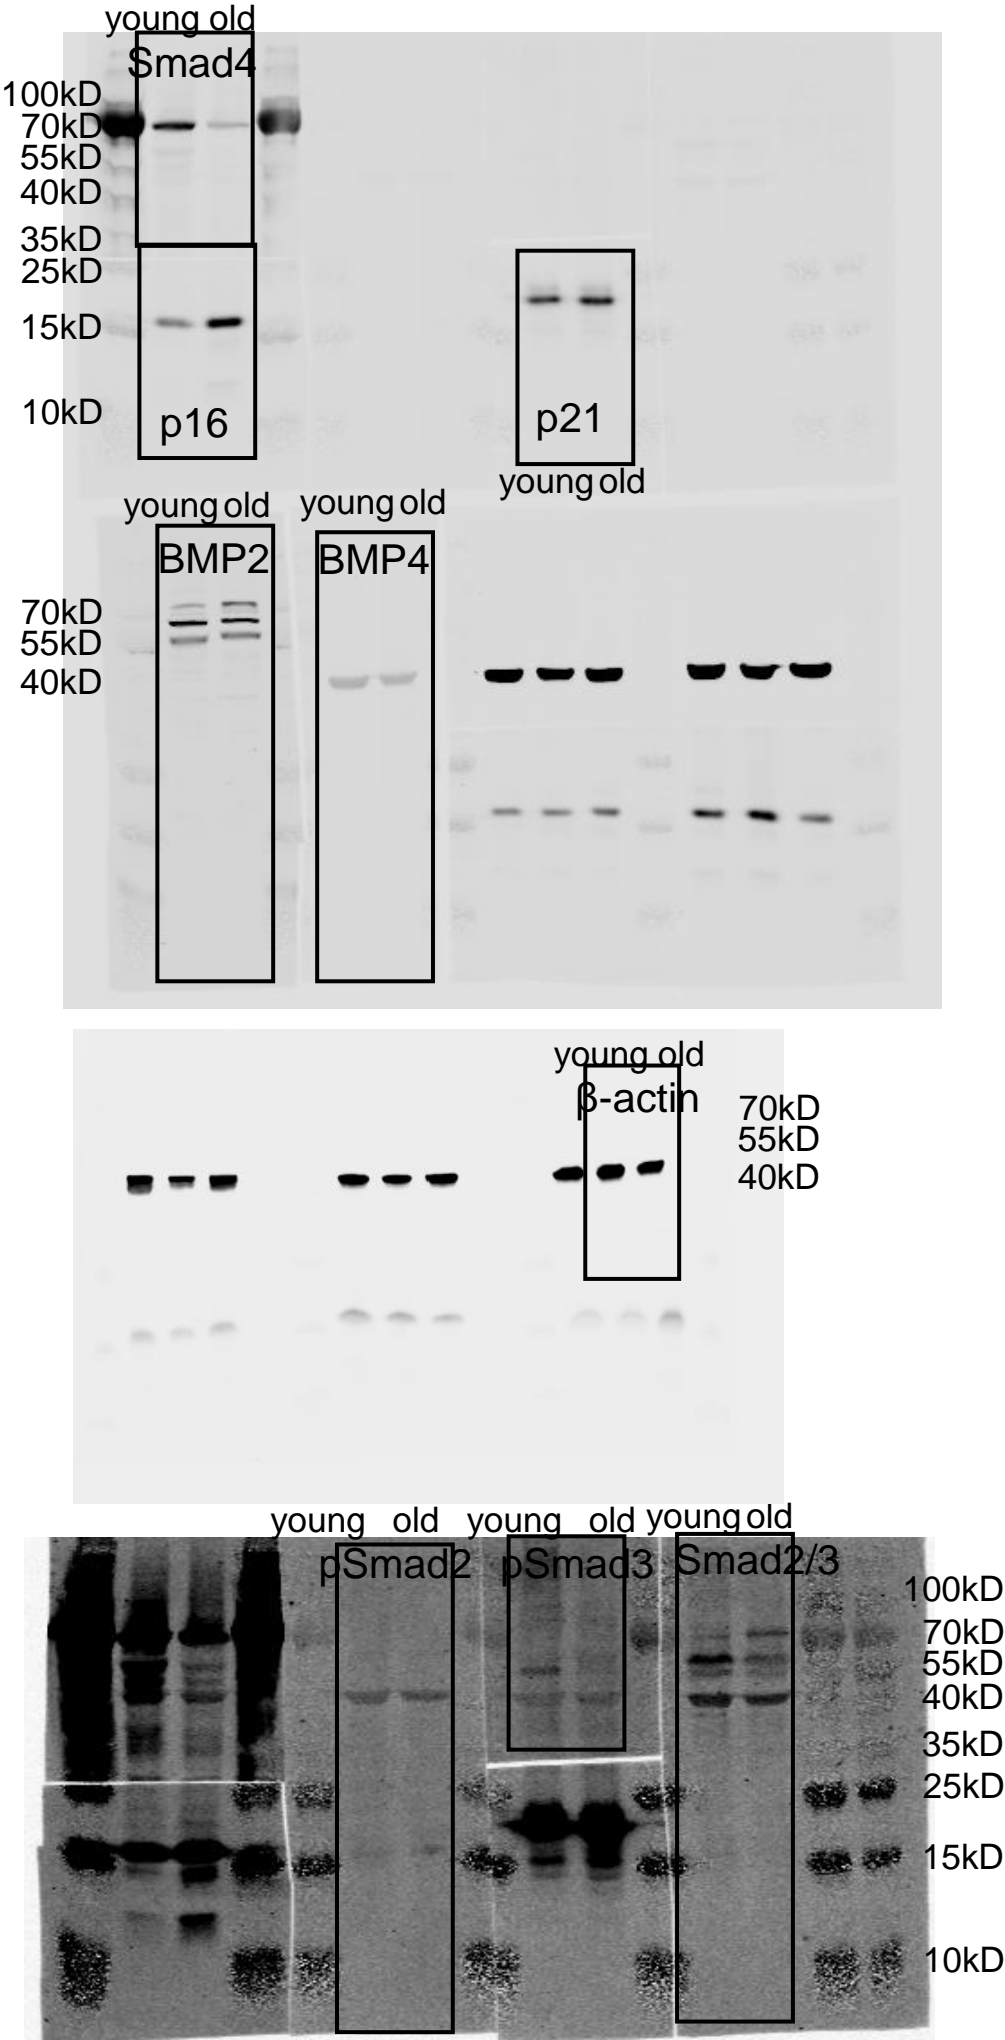

**Figure 2-figure supplement 1, Source Data 1.** Original membranes corresponding to Figure 2-figure supplement 1A, B. Lanes of Figure 2-figure supplement 1A from left to right correspond to IMR90 cells treated with enalapril at 0 and 10 $\mu$ M, respectively. Lanes of Figure 2-figure supplement 1B from left to right correspond to young and old IMR90 cells, respectively.
