# Supplementary material for: Enalapril mitigates senescence and aging-related phenotypes in human cells and mice via pSmad1/5/9-driven antioxidative genes
Source: eLife journal article supplement (doi:10.7554/elife.104774), 2025-02-12
Supplement: fig2-figsupp2-data1 [file elife-104774-fig2-figsupp2-data1-v1.zip]

Figure 2-figure supplement 2, Source Data 1

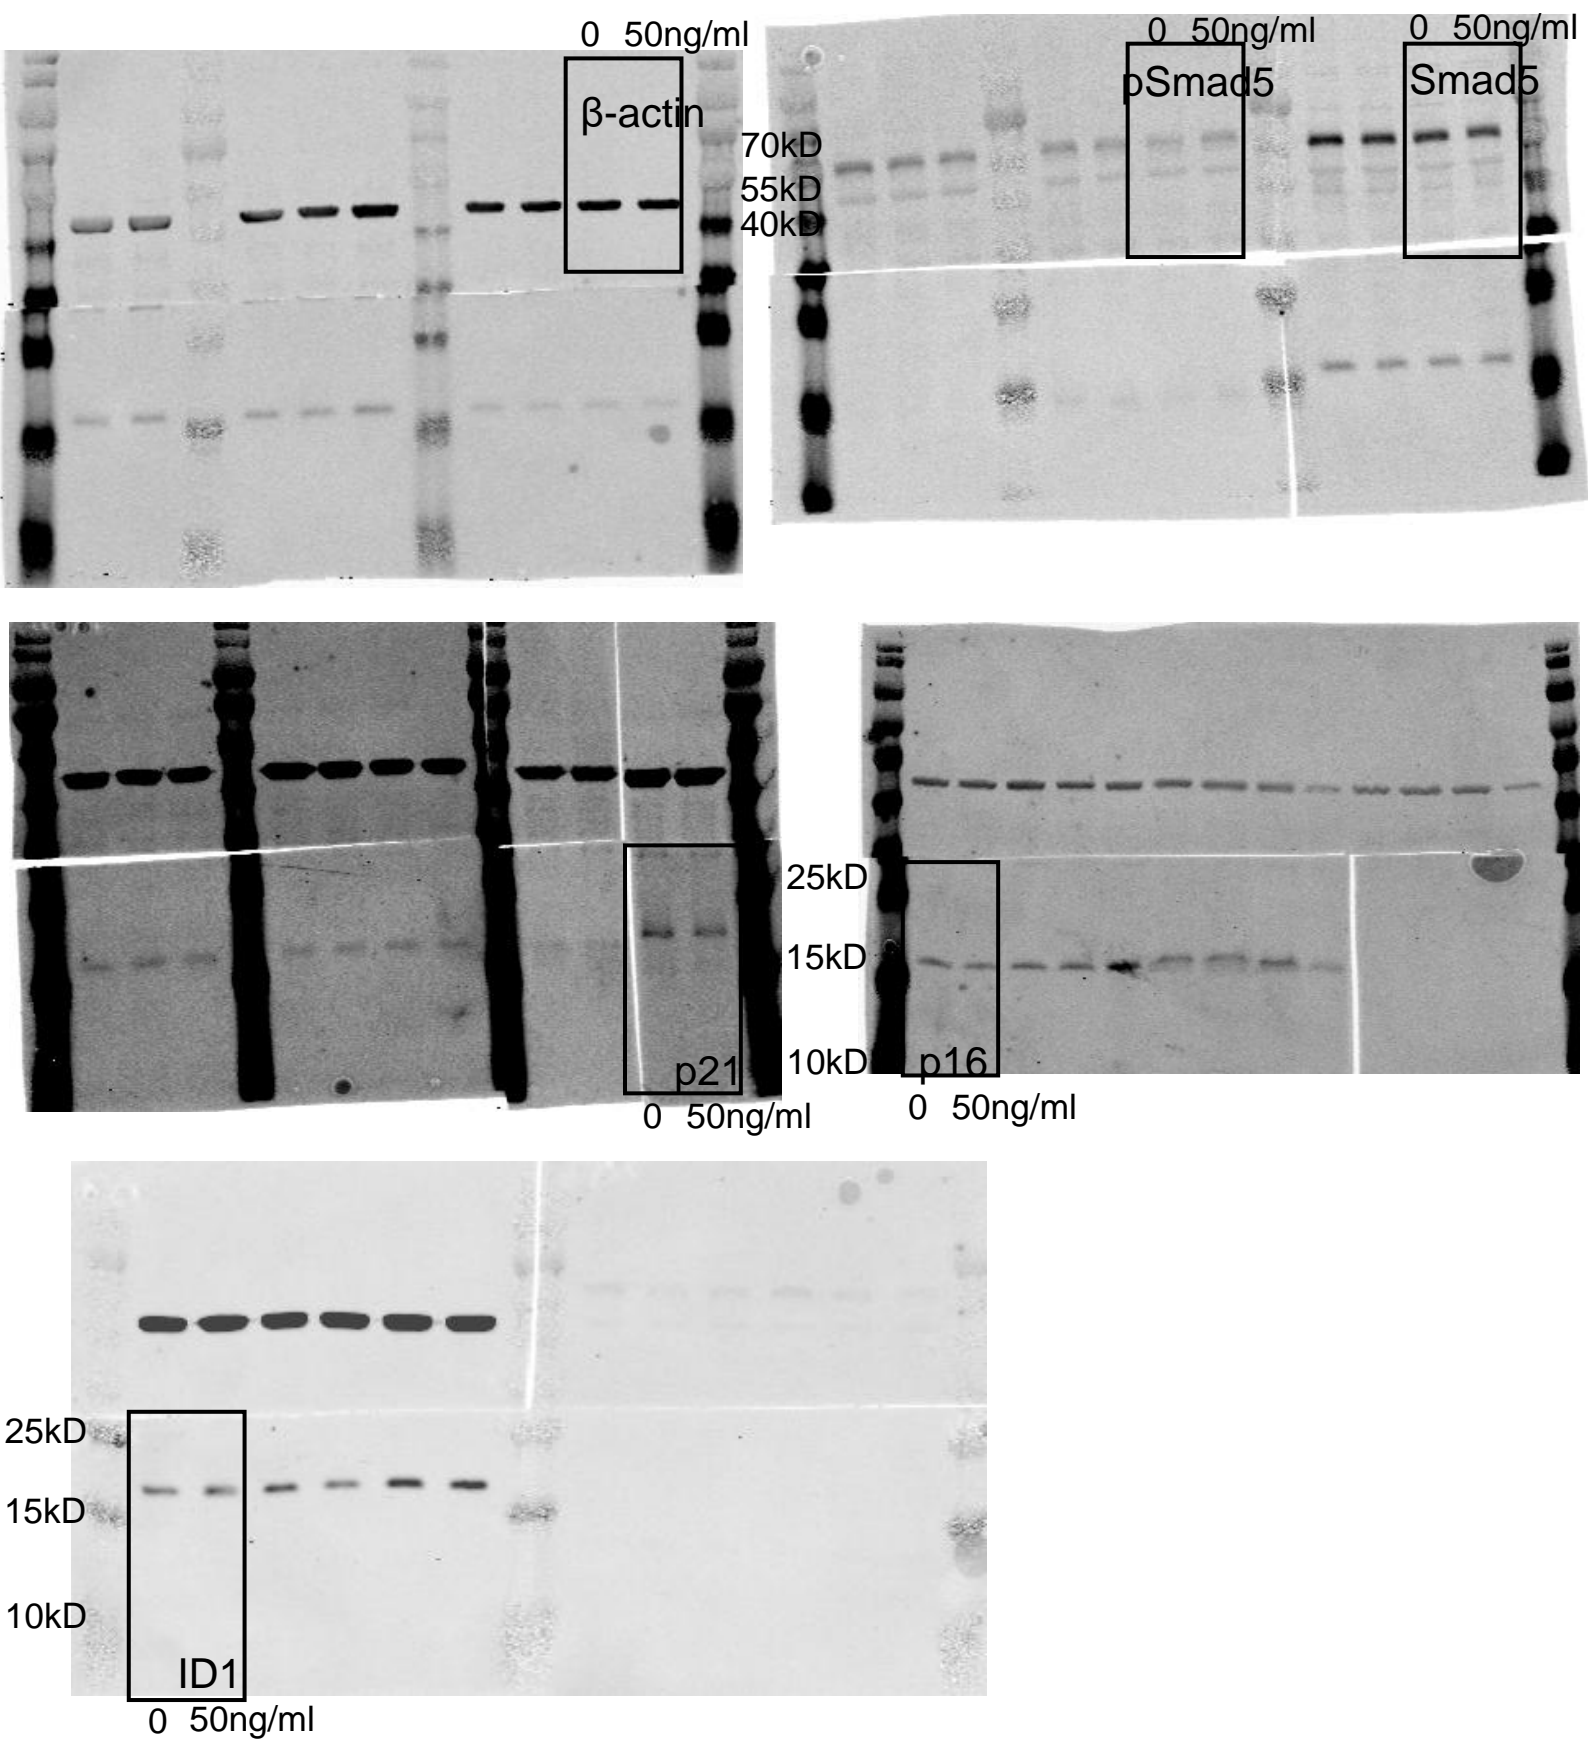

**Figure 2-figure supplement 2, Source Data 1.** Original membranes corresponding to Figure 2-figure supplement 2A. Lanes from left to right correspond to IMR90 cells treated with BMP4 at 0 and 50ng/ml, respectively.
