# Supplementary material for: Enalapril mitigates senescence and aging-related phenotypes in human cells and mice via pSmad1/5/9-driven antioxidative genes
Source: eLife journal article supplement (doi:10.7554/elife.104774), 2025-02-12

# Figure 2-figure supplement 3, Source Data 1

## Figure 2-figure supplement 3A

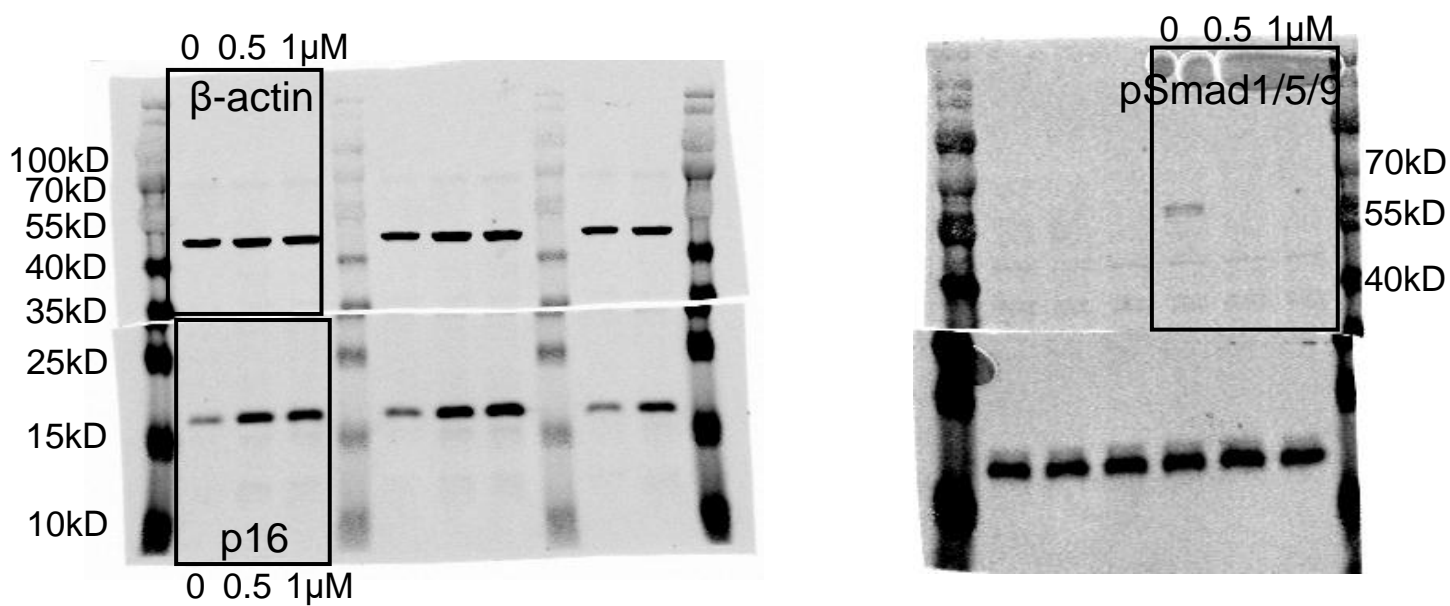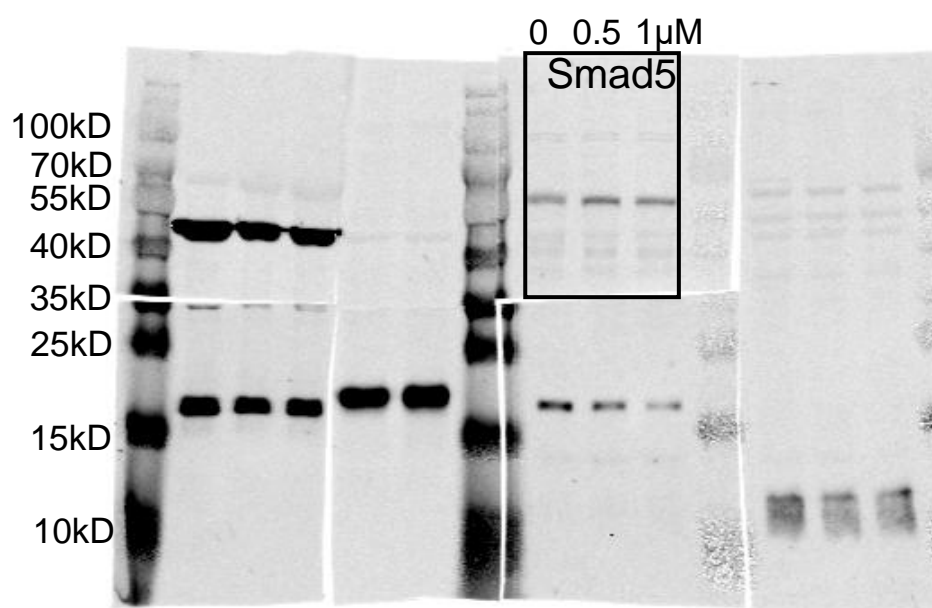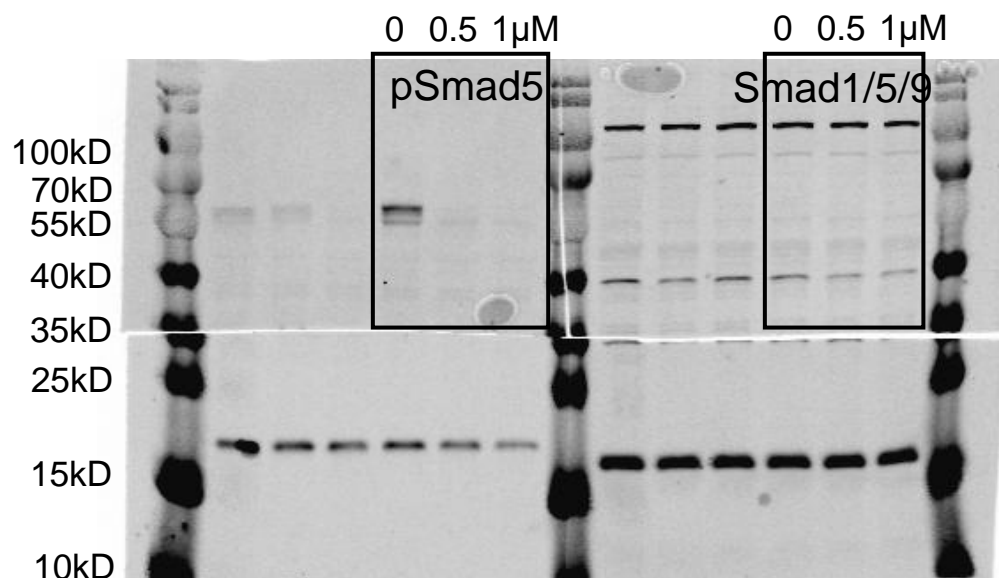

Figure 2-figure supplement 3, Source Data 1

Figure 2-figure supplement 3D

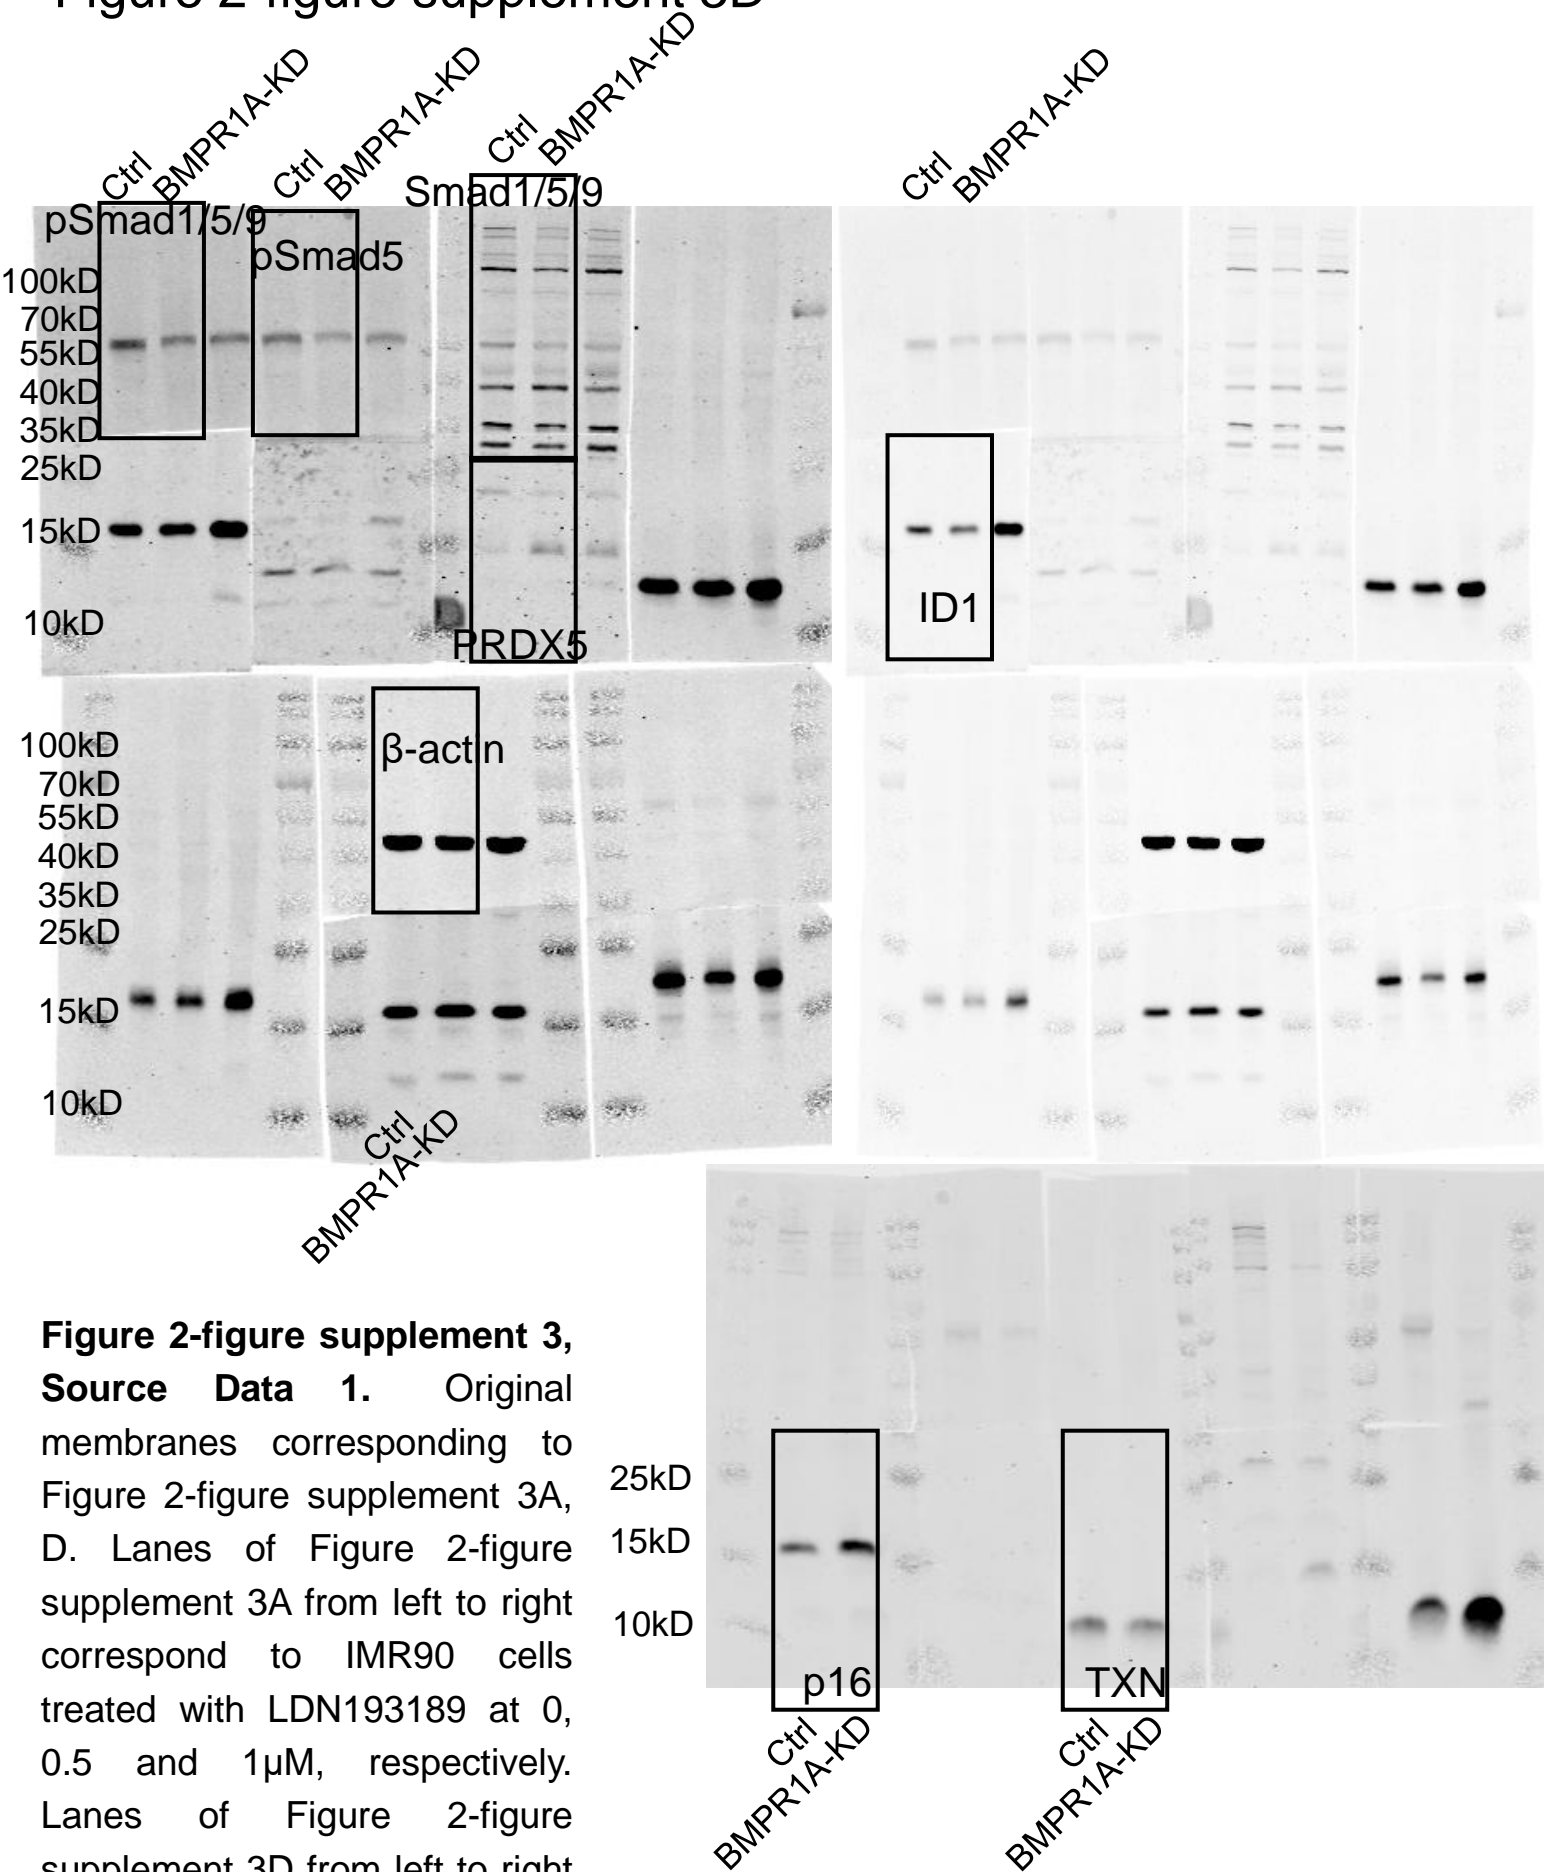

Supplement: fig2-figsupp3-data1 [file elife-104774-fig2-figsupp3-data1-v1.zip]
