# Supplementary material for: Enalapril mitigates senescence and aging-related phenotypes in human cells and mice via pSmad1/5/9-driven antioxidative genes
Source: eLife journal article supplement (doi:10.7554/elife.104774), 2025-02-12
Supplement: fig3-data1 [file elife-104774-fig3-data1-v1.zip]

Figure 3, Source Data 1

Figure 3C

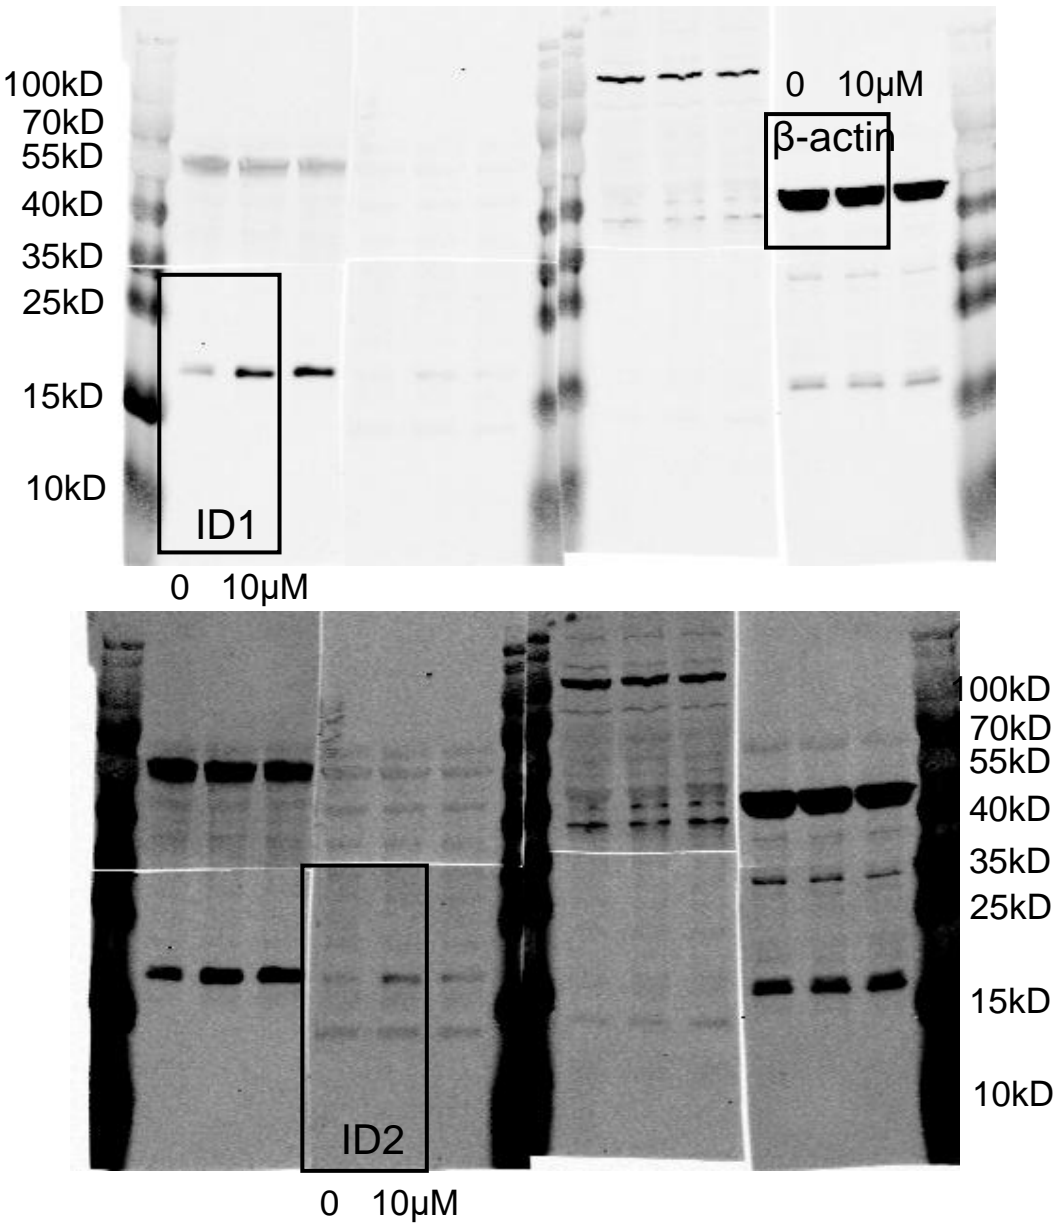

Figure 3, Source Data 1

Figure 3E

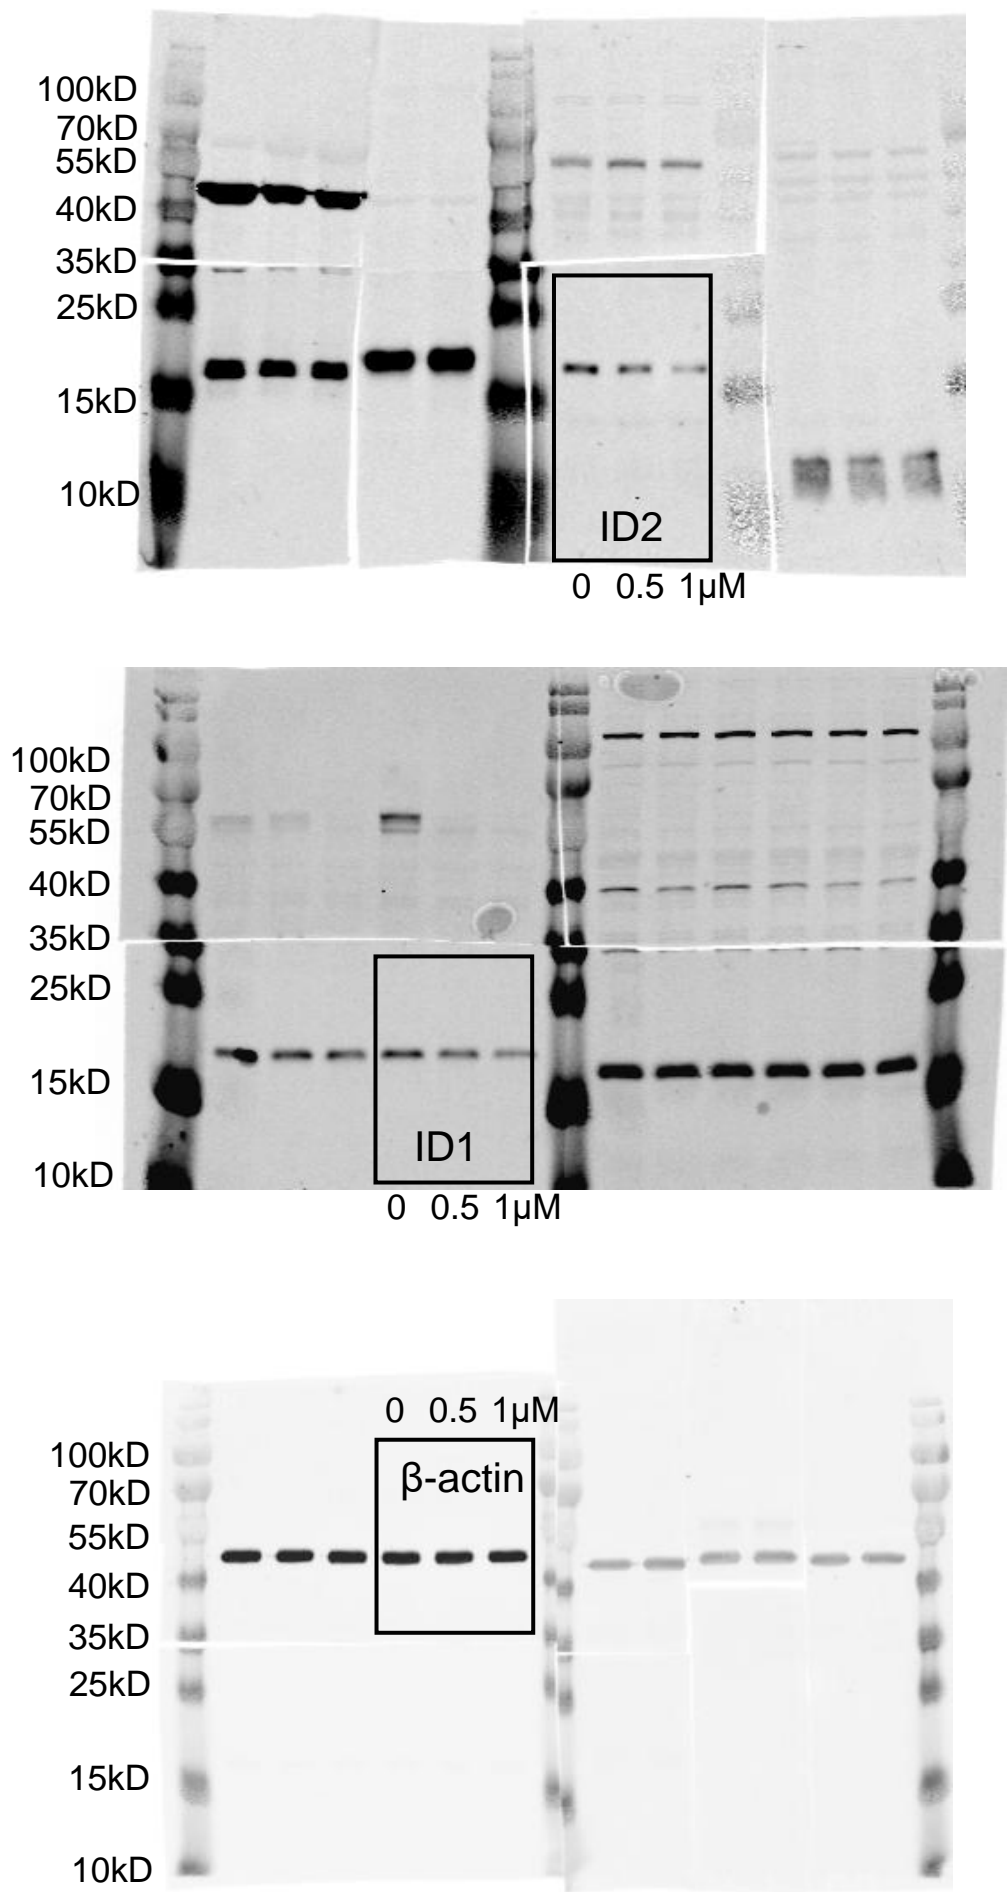

Figure 3, Source Data 1

Figure 3F

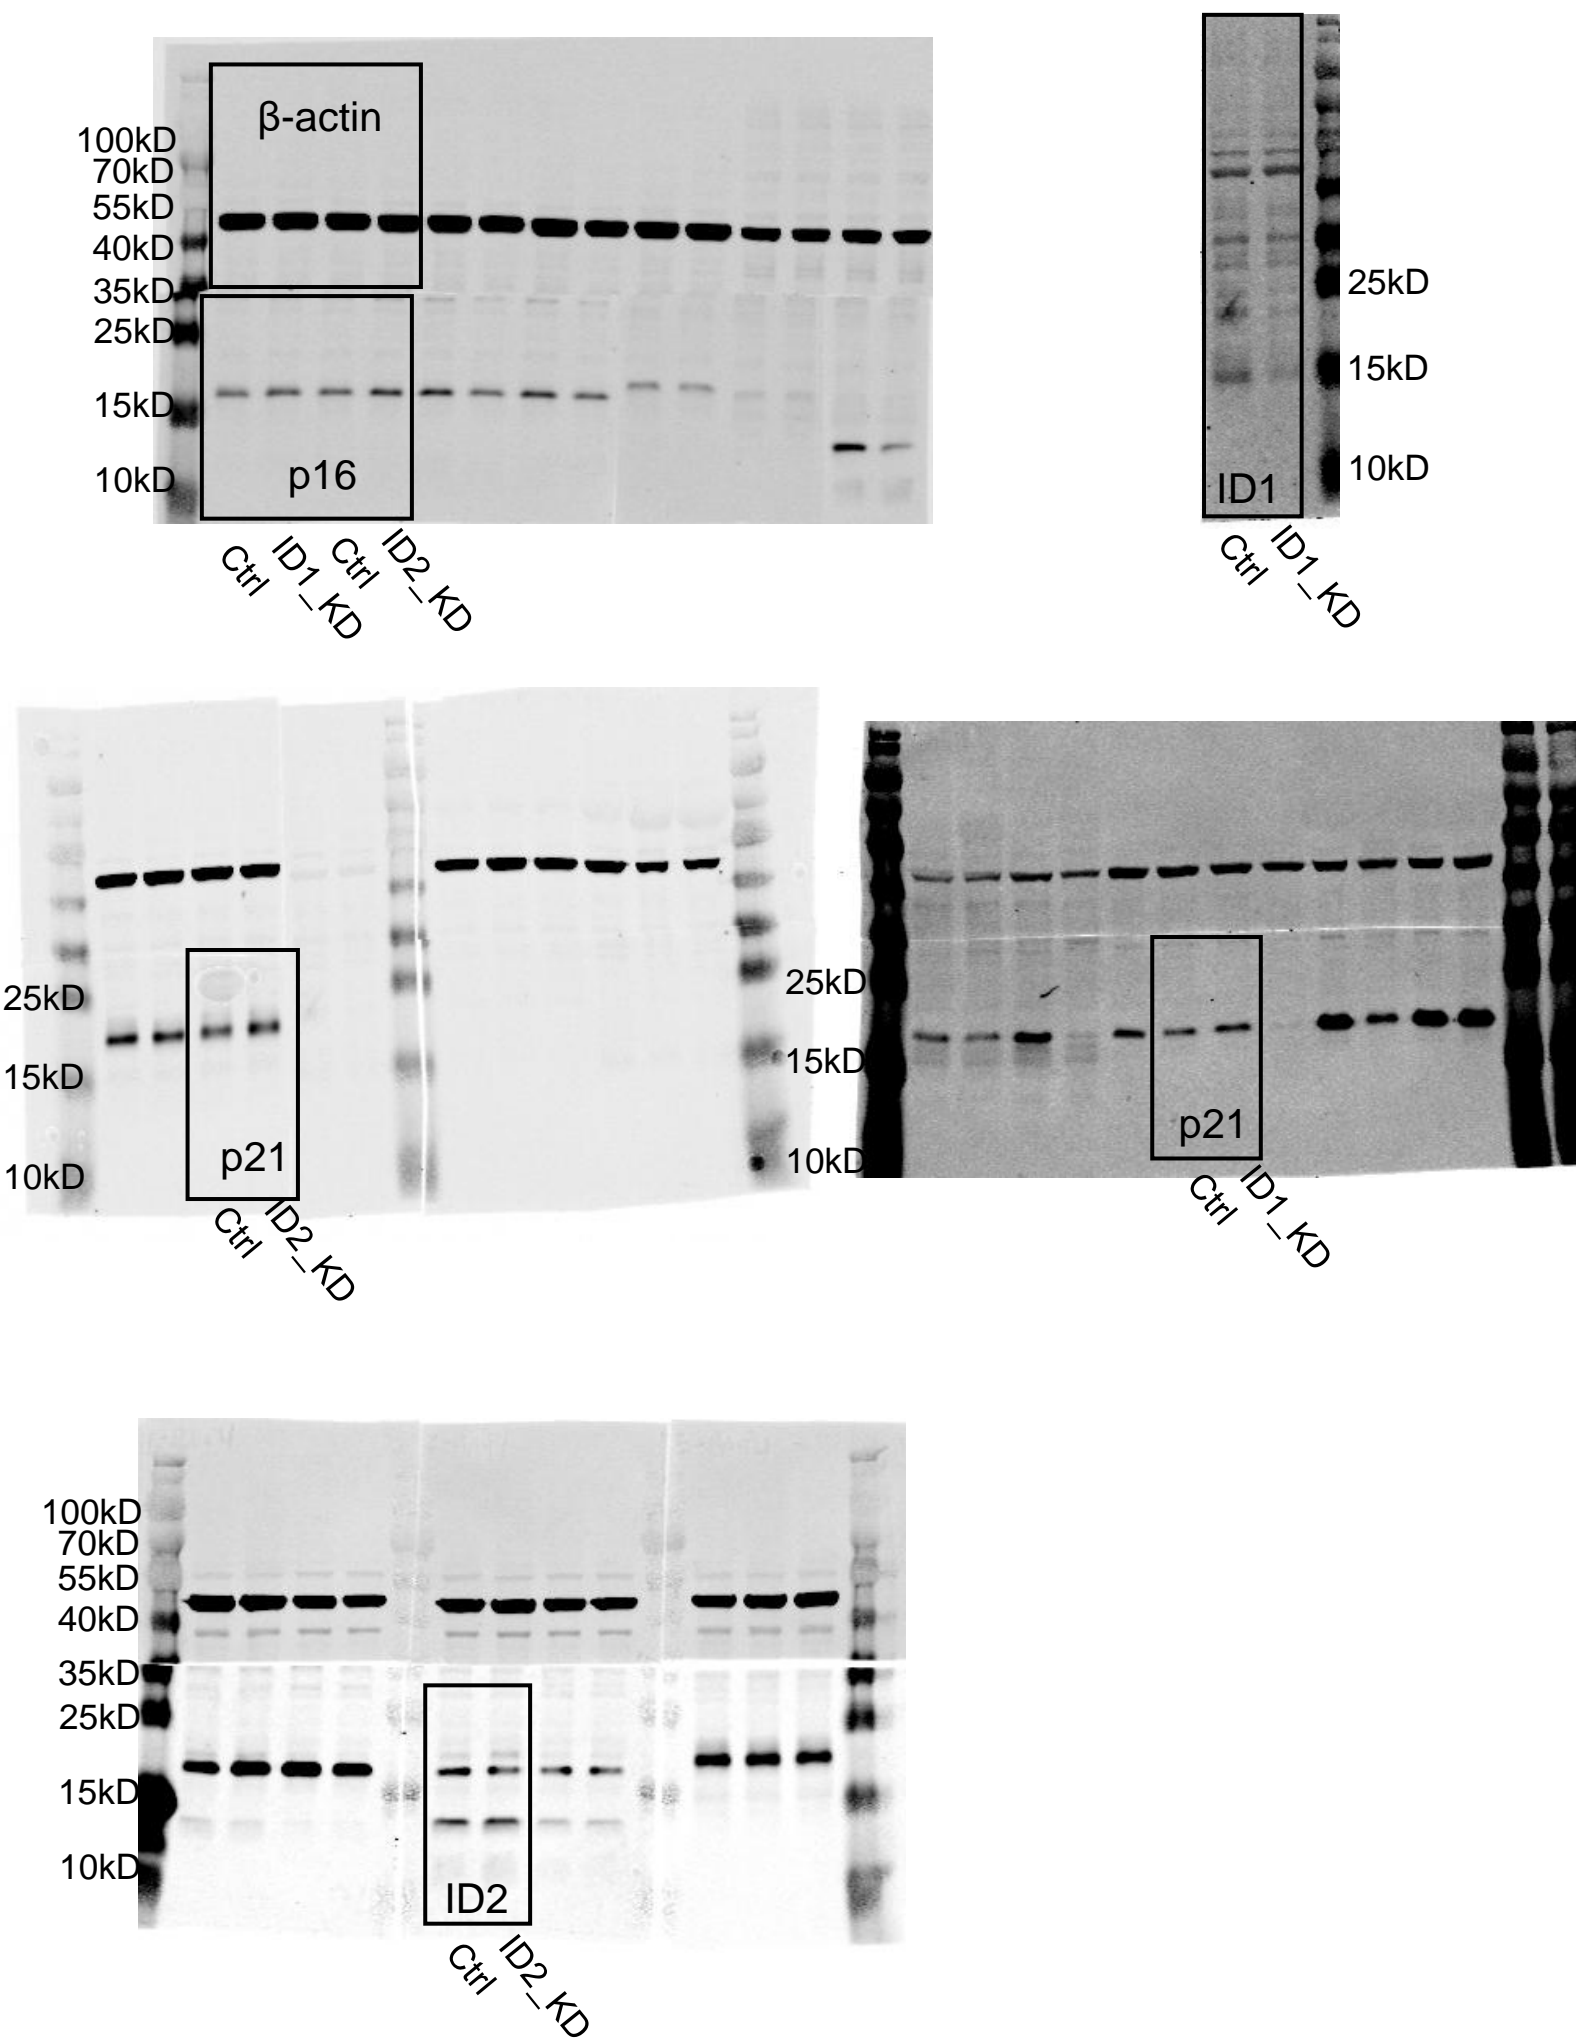

Figure 3, Source Data 1

Figure 3I

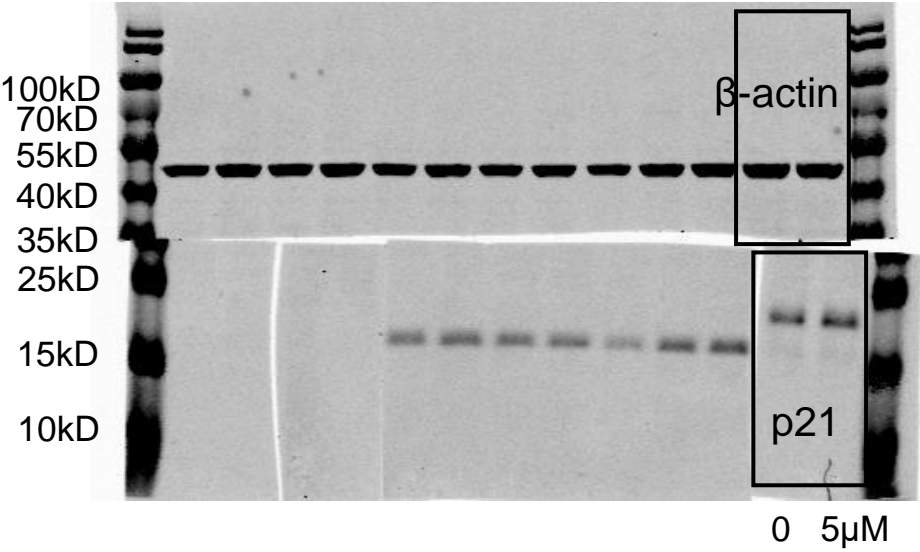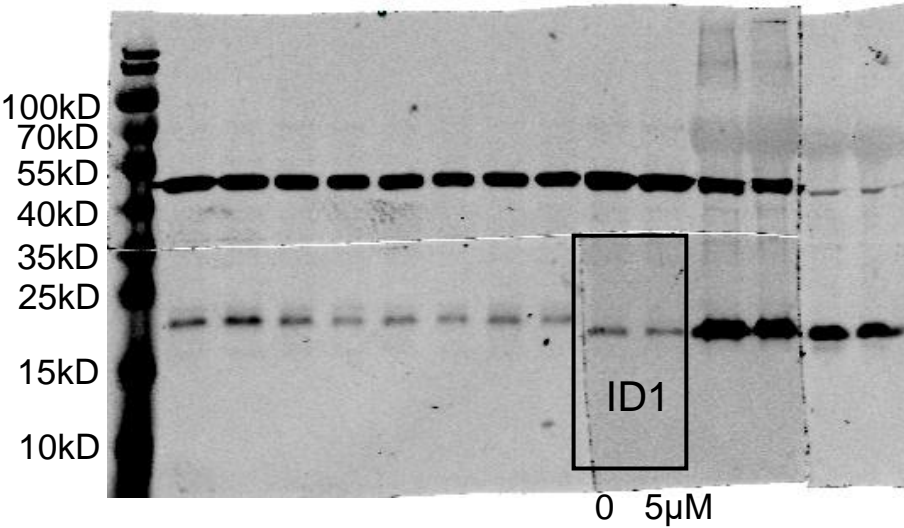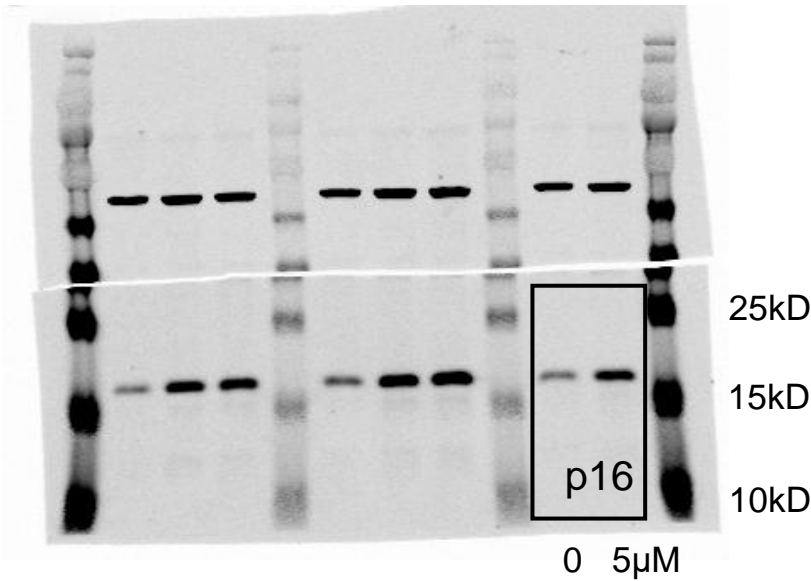

## Figure 3, Source Data 1

### Figure 3J

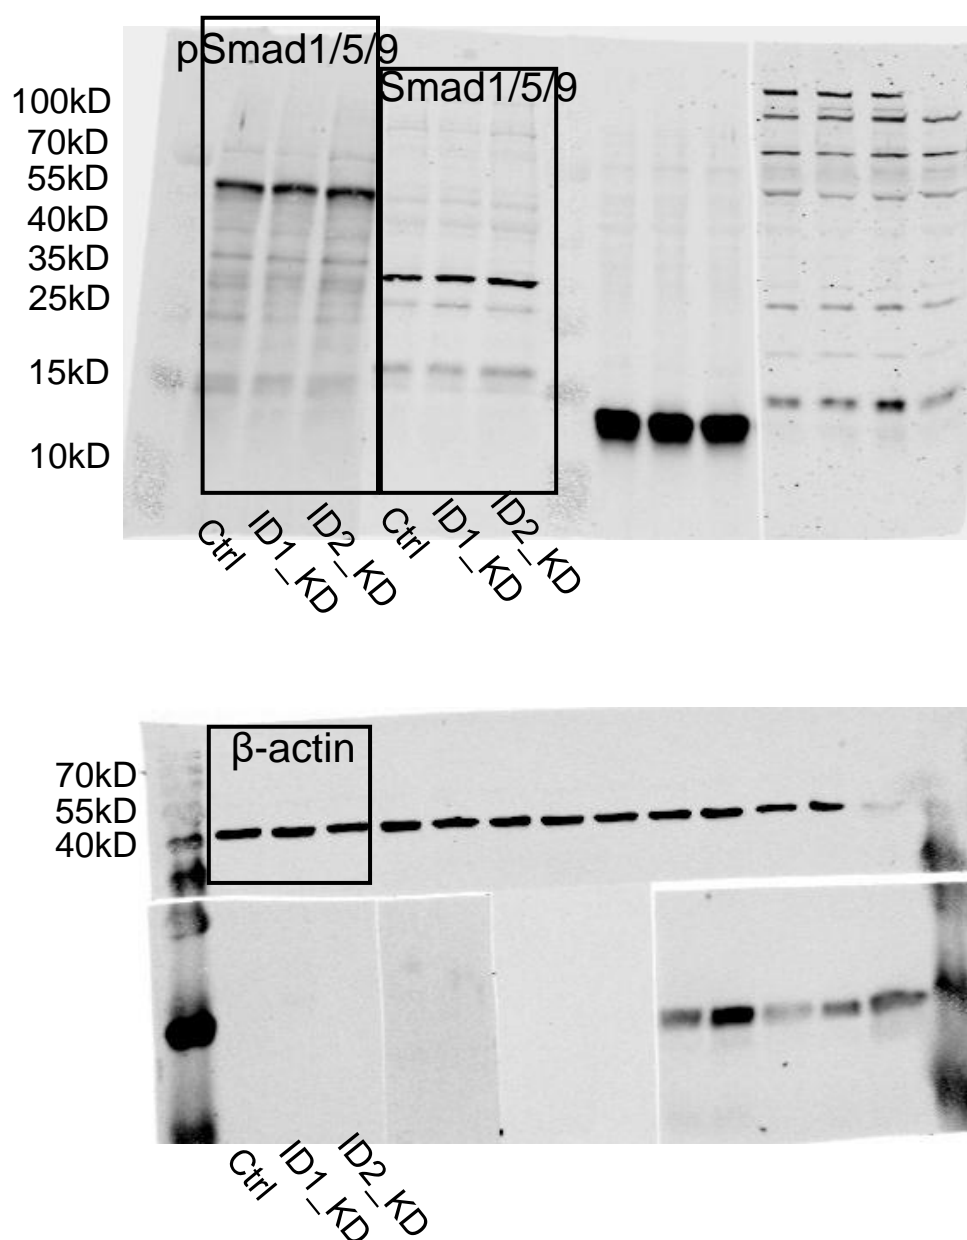

**Figure 3, Source Data 1.** Original membranes corresponding to Figure 3C, E, F, I and J. Lanes of Figure 3C from left to right correspond to IMR90 cells treated with enalapril at 0 and 10 $\mu$ M, respectively. Lanes of Figure 3E from left to right correspond to IMR90 cells treated with LDN193189 at 0, 0.5 and 1 $\mu$ M, respectively. Lanes of Figure 3F from left to right correspond to Ctrl and ID knockdown IMR90 cells, respectively. Lanes of Figure 3I from left to right correspond to IMR90 cells treated with ID1 inhibitor at 0 and 5 $\mu$ M, respectively. Lanes of Figure 3J from left to right correspond to Ctrl, ID1 knockdown and ID2 knockdown IMR90 cells, respectively.
