# Supplementary material for: Enalapril mitigates senescence and aging-related phenotypes in human cells and mice via pSmad1/5/9-driven antioxidative genes
Source: eLife journal article supplement (doi:10.7554/elife.104774), 2025-02-12
Supplement: fig3-figsupp1-data1 [file elife-104774-fig3-figsupp1-data1-v1.zip]

Figure 3-figure supplement 1, Source Data 1

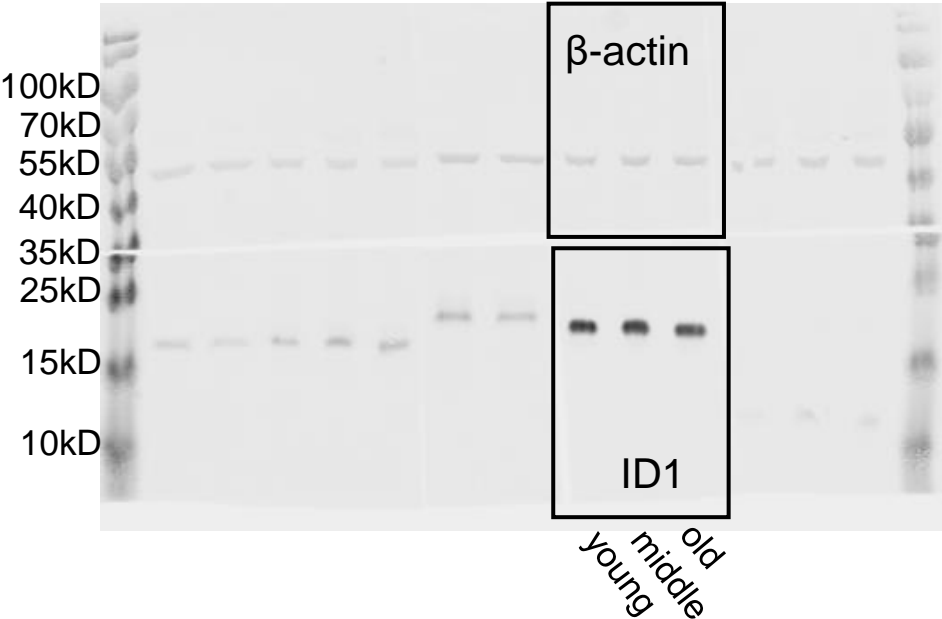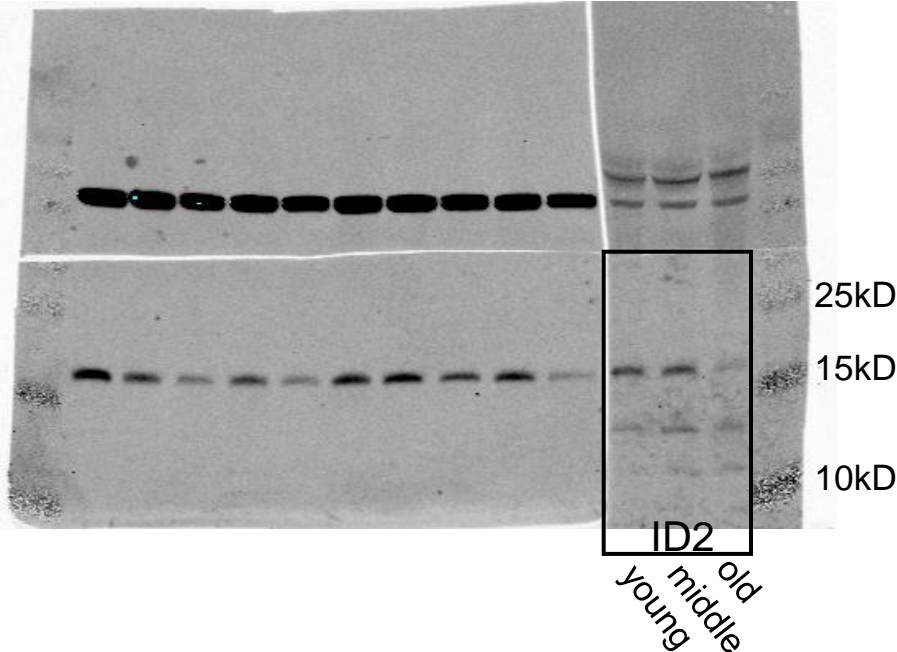

**Figure 3-figure supplement 1, Source Data 1.** Original membranes corresponding to Figure 3-figure supplement 1A. Lanes from left to right correspond to young, middle and old IMR90 cells, respectively.
