# Supplementary material for: Enalapril mitigates senescence and aging-related phenotypes in human cells and mice via pSmad1/5/9-driven antioxidative genes
Source: eLife journal article supplement (doi:10.7554/elife.104774), 2025-02-12
Supplement: fig4-data1 [file elife-104774-fig4-data1-v1.zip]

Figure 4, Source Data 1

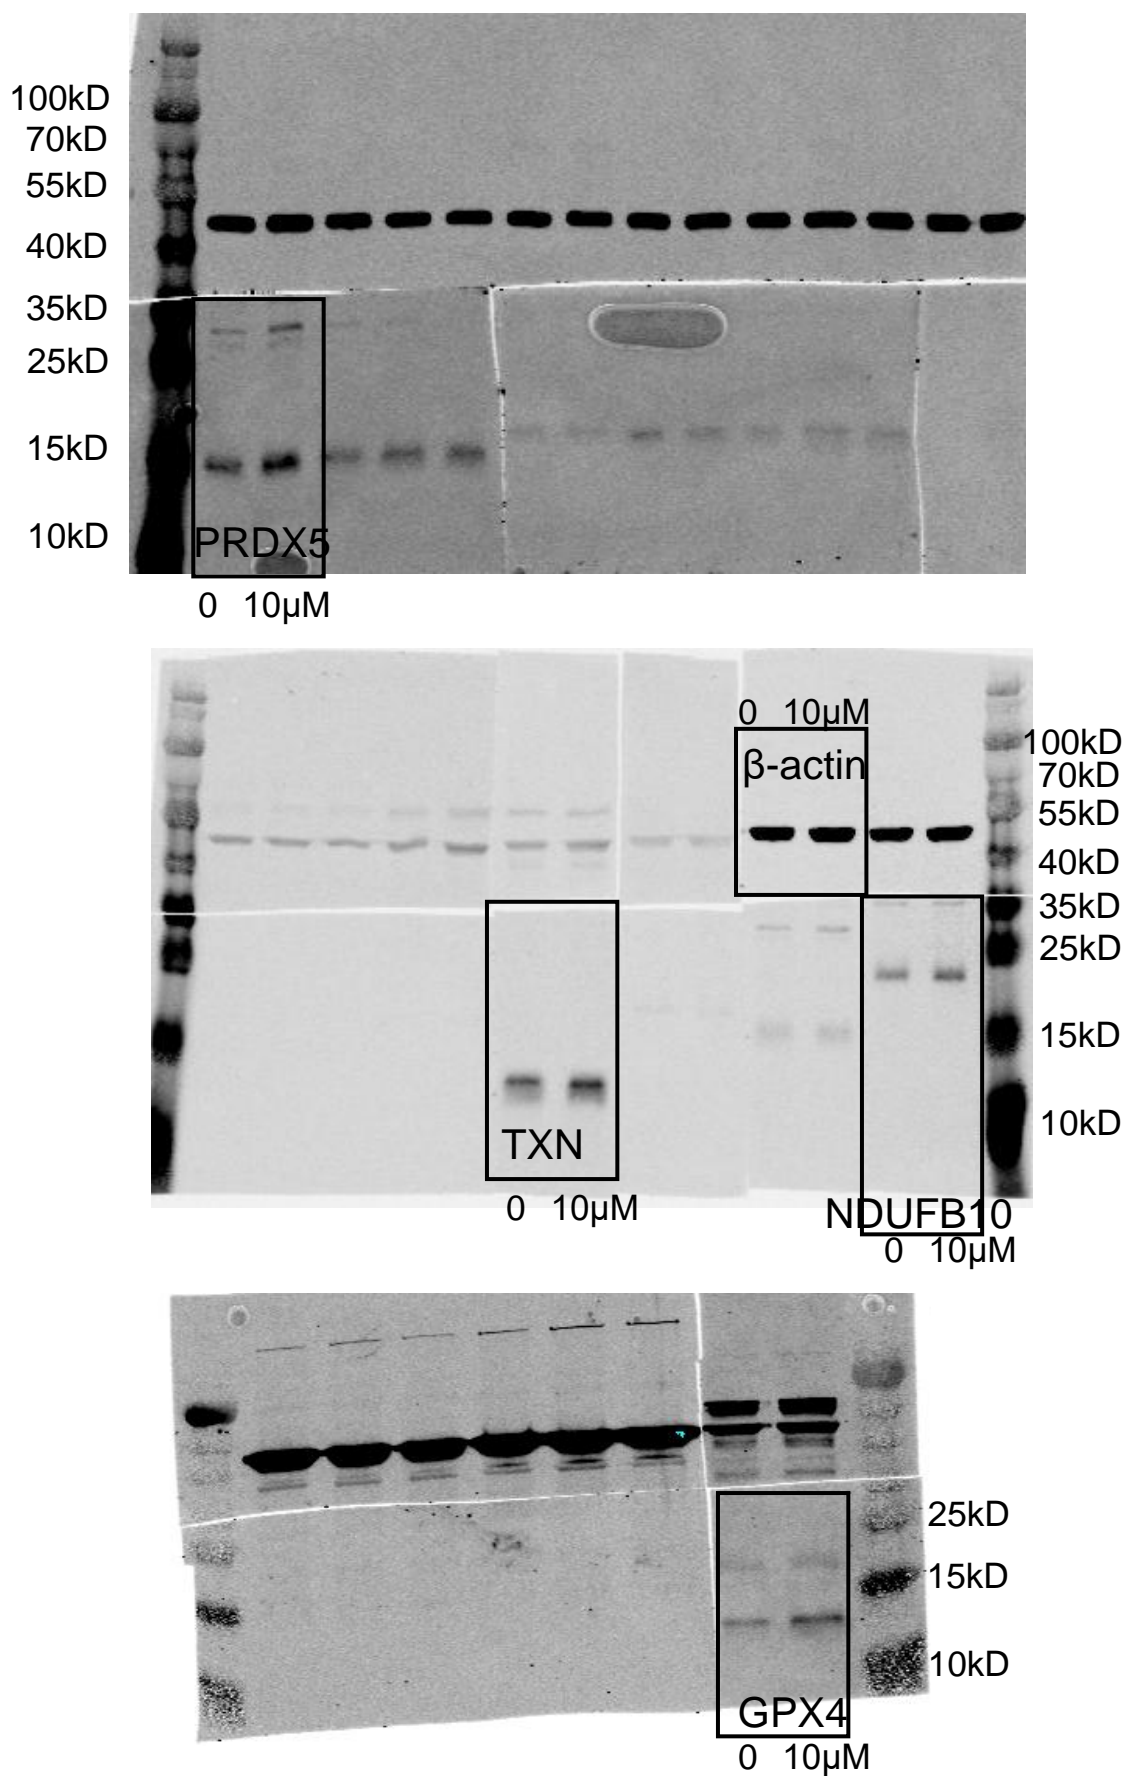

**Figure 4, Source Data 1.** Original membranes corresponding to Figure 4D. Lanes from left to right correspond to IMR90 cells treated with enalapril at 0 and 10μM, respectively.
