# Supplementary material for: Enalapril mitigates senescence and aging-related phenotypes in human cells and mice via pSmad1/5/9-driven antioxidative genes
Source: eLife journal article supplement (doi:10.7554/elife.104774), 2025-02-12
Supplement: fig5-data1 [file elife-104774-fig5-data1-v1.zip]

Figure 5, Source Data 1

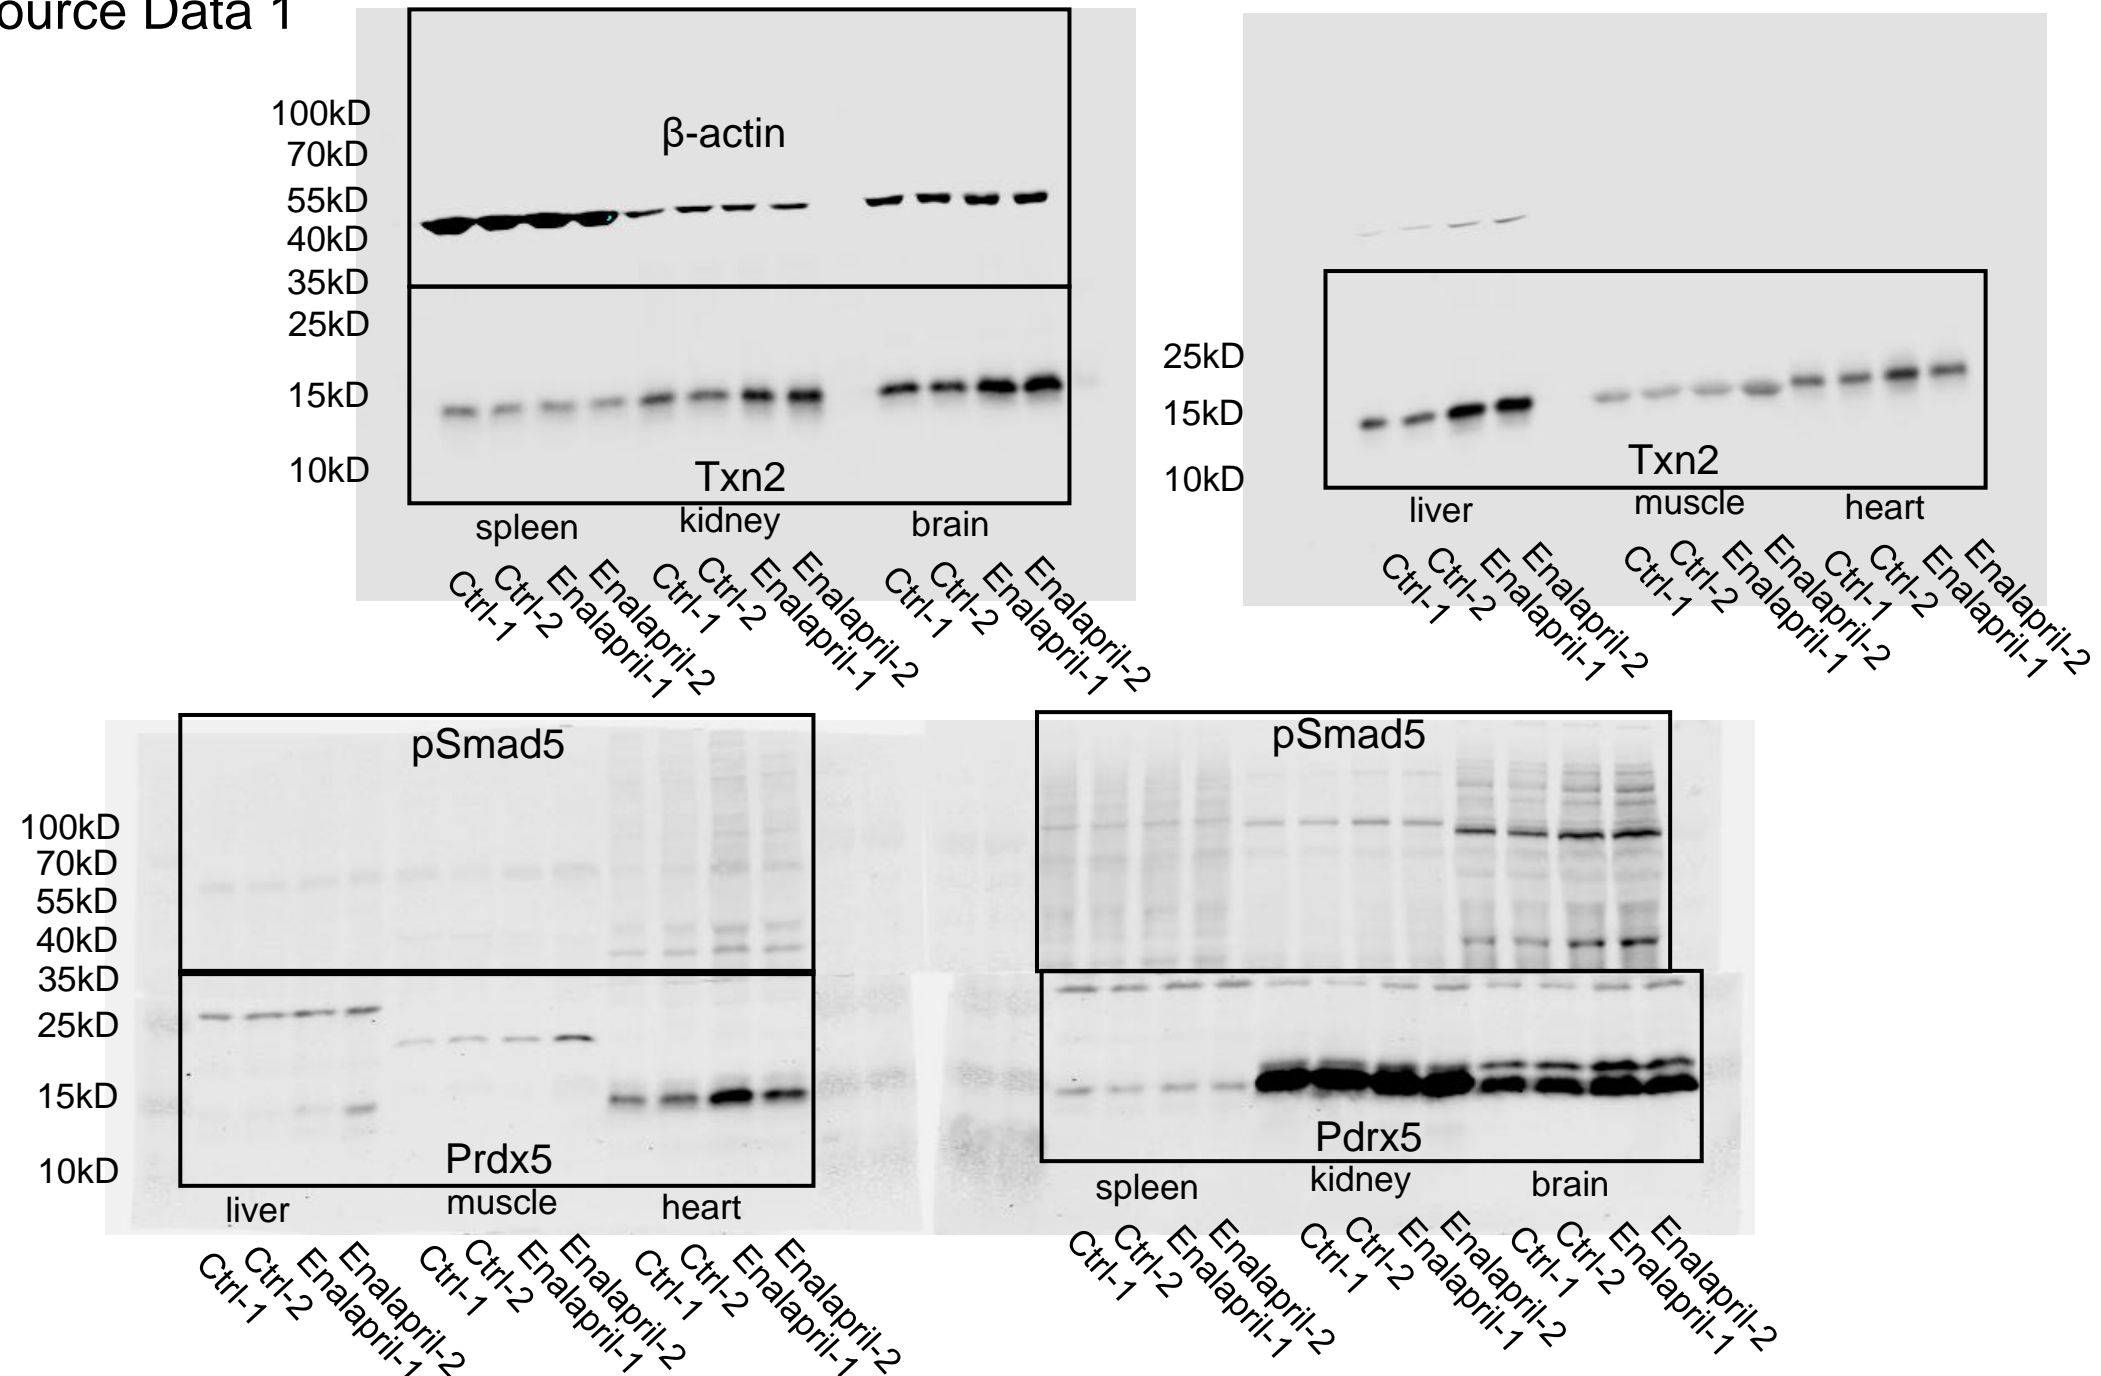

Figure 5, Source Data 1

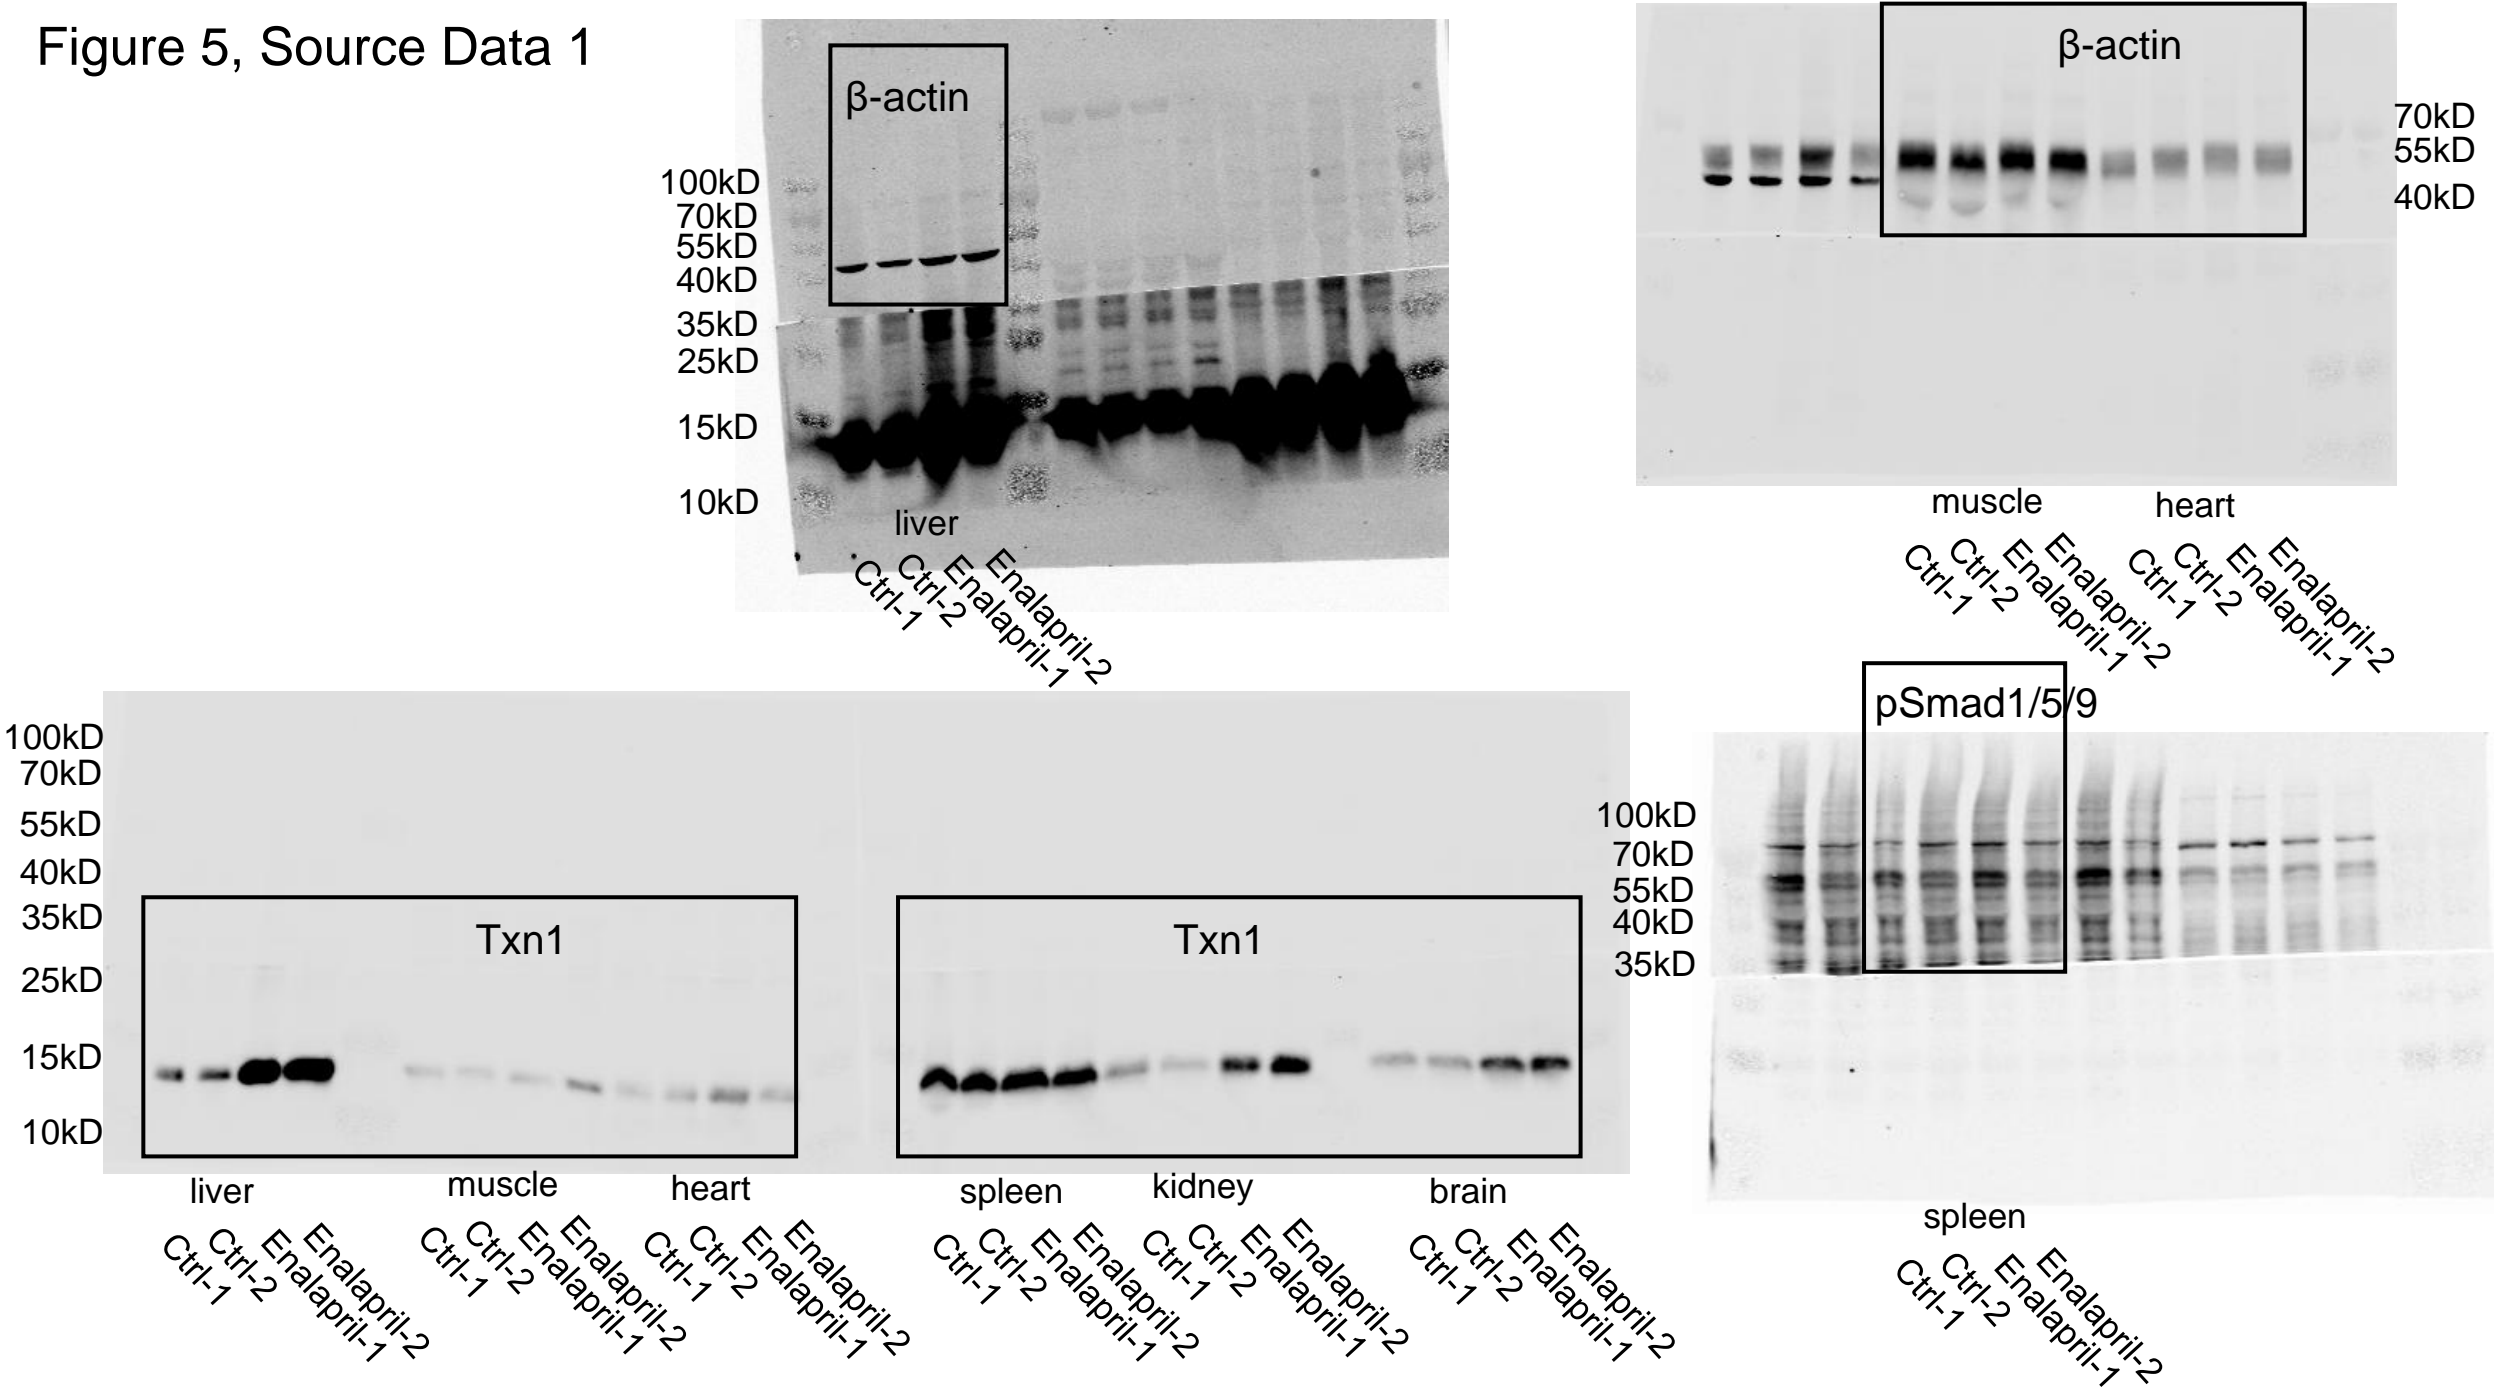

Figure 5, Source Data 1

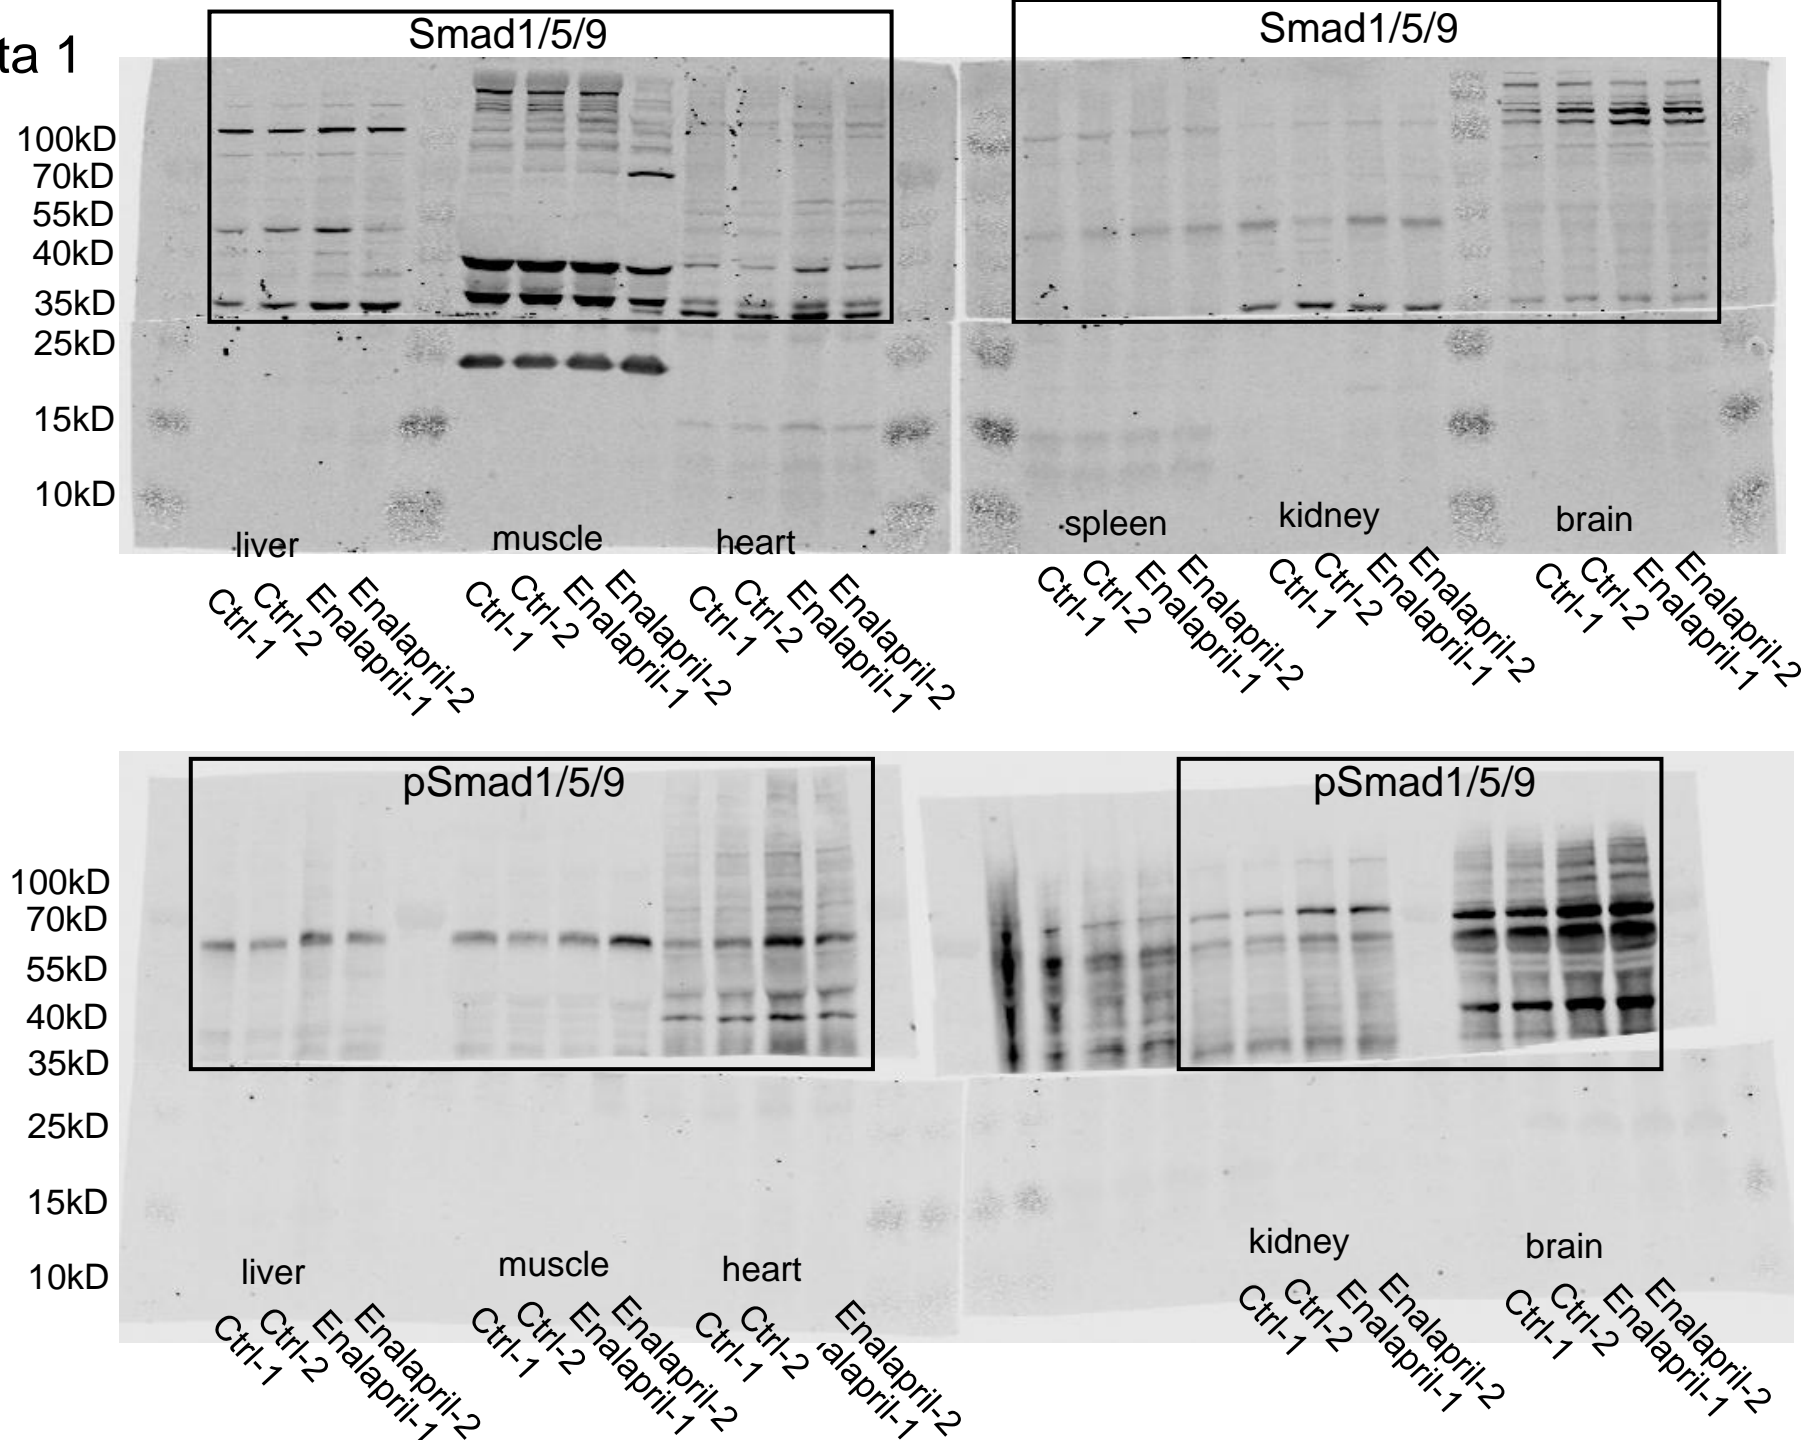

**Figure 5, Source Data 1.** Original membranes corresponding to Figure 5-figure supplement 1D. Lanes from left to right correspond to Ctrl-1, Ctrl-2, Enalapril-1 and Enalapril-2 of liver, muscle, heart, spleen, kidney and brain, respectively.
